# Supplementary material
Source: publisher figshare collection journal article supplement (https://acs.figshare.com/ndownloader/files/3908443)
Supplement: Supplementary file 1 [file 3908443]

## Supporting Information

# Borane-Protected Cyanides as Surrogates of H-Bonded Cyanides in [FeFe]-Hydrogenase Active Site Models

Brian C. Manor, Mark R. Ringenberg, and Thomas B. Rauchfuss\*

School of Chemical Sciences, University of Illinois, Urbana, Illinois 61801, United States

## Table of Contents

|                                                                                                                      |
|----------------------------------------------------------------------------------------------------------------------|
| p. S2, Experimental Procedures                                                                                       |
| p. S2, Table S1. $pK_a$ Determination of $(Et_4N)_2[1(BAr^F_3)_2]$ with $PhNH_3BAr^{F24}$ .                          |
| p. S2, Table S2. $pK_a$ Determination of $(Et_4N)_2[1(BAr^{F\#}_3)_2]$ with $PyHBAr^{F24}$ .                         |
| p. S3, Table S3. Selected Bond Distances of $[1(BAr^F_3)_2]^{2-}$ and $[1]^{2-}$                                     |
| p. S3, Figure S1. IR spectra of $K_2[1]$ and $K[2]$ in MeCN at 20°C.                                                 |
| p. S4, Figure S2. IR spectrum of $K_2[3]$ in MeCN at 20°C.                                                           |
| p. S5, Figure S3. IR spectra of $(Et_4N)_2[1(BR_3)_2]$ complexes in $CH_2Cl_2$ at 20°C.                              |
| p. S6, Figure S4. IR spectra of $(Et_4N)_2[3(BPh_3)_2]$ in $CH_2Cl_2$ at 20°C.                                       |
| p. S7, Figure S5. IR spectra of $Et_4N[H1(BR_3)_2]$ complexes in $CH_2Cl_2$ at 20°C.                                 |
| p. S8, Figure S6. IR spectra of $Et_4N[H3(BPh_3)_2]$ in $CH_2Cl_2$ at 20°C.                                          |
| p. S9, Figure S7. $^{19}F$ NMR of $(Et_4N)_2[1(BAr^F_3)_2]$ in $CD_2Cl_2$ at 20°C.                                   |
| p. S10, Figure S8. $^{11}B$ NMR of $(Et_4N)_2[1(BAr^F_3)_2]$ in $CD_2Cl_2$ at 20°C.                                  |
| p. S11, Figure S9. $^1H$ NMR of $(Et_4N)_2[1(BPh_3)_2]$ in $CD_2Cl_2$ at 20°C.                                       |
| p. S12, Figure S10. $^{11}B$ NMR of $(Et_4N)_2[1(BPh_3)_2]$ in $CD_2Cl_2$ at 20°C.                                   |
| p. S13, Figure S11. $^{19}F$ NMR of $(Et_4N)_2[1(BAr^{F\#}_3)_2]$ in $CD_2Cl_2$ at 20°C.                             |
| p. S14, Figure S12. $^{11}B$ NMR of $(Et_4N)_2[1(BAr^{F\#}_3)_2]$ in $CD_2Cl_2$ at 20°C.                             |
| p. S15, Figure S13. Isomerization of $Et_4N[H1(BAr^F_3)_2]$ in $CD_2Cl_2$ by $^1H$ NMR at 20°C.                      |
| p. S16, Figure S14. Isomerization of $Et_4N[H1(BAr^F_3)_2]$ in $CD_2Cl_2$ by $^{19}F$ NMR at 20°C.                   |
| p. S17, Figure S15. $^{11}B$ NMR of $Et_4N[H1(BAr^F_3)_2]$ in $CD_2Cl_2$ at 20°C.                                    |
| p. S18, Figure S16. Isomerization of the hydride signals of $Et_4N[H1(BPh_3)_2]$ in $CD_2Cl_2$ by $^1H$ NMR at 20°C. |
| p. S19, Figure S17. Isomerization of the $BPh_3$ signals of $Et_4N[H1(BPh_3)_2]$ in $CD_2Cl_2$ by $^1H$ NMR at 20°C. |
| p. S20, Figure S18. Isomerization of $Et_4N[H1(BAr^{F\#}_3)_2]$ in $CD_2Cl_2$ monitored by $^1H$ NMR at 20°C.        |
| p. S21, Figure S19. Isomerization of $Et_4N[H1(BAr^{F\#}_3)_2]$ in $CD_2Cl_2$ monitored by $^{19}F$ NMR at 20°C.     |
| p. S22, Figure S20. $^1H$ NMR of hydride signals of $Et_4N[H3(BPh_3)_2]$ in $CD_2Cl_2$ at 20°C.                      |
| p. S23, Figure S21. Oxidation of $(Et_4N)_2[1(BAr^F_3)_2]$ in $CH_2Cl_2$ by Cyclic Voltamogramm.                     |
| p. S24, Figure S22. Oxidation of $(Et_4N)_2[1(BPh_3)_2]$ in $CH_2Cl_2$ by Cyclic Voltamogramm.                       |
| p. S25, Figure S23. Oxidation of $(Et_4N)_2[1(BAr^{F\#}_3)_2]$ in $CH_2Cl_2$ by Cyclic Voltamogramm.                 |
| p. S26, Figure S24. Reduction of $Et_4N[H1(BAr^F_3)_2]$ in $CH_2Cl_2$ by Cyclic Voltamogramm.                        |
| p. S27, Figure S25. Reduction of $Et_4N[H1(BPh_3)_2]$ in $CH_2Cl_2$ by Cyclic Voltamogramm.                          |
| p. S28, Figure S26. Reduction of $Et_4N[H1(BAr^{F\#}_3)_2]$ in $CH_2Cl_2$ by Cyclic Voltamogramm.                    |
| p. S29, Figure S27. Oxidation of $Et_4N[H1(BAr^F_3)_2]$ in $CH_2Cl_2$ by Cyclic Voltamogramm.                        |
| p. S30, Figure S28. Oxidation of $Et_4N[H1(BAr^{F\#}_3)_2]$ in $CH_2Cl_2$ by Cyclic Voltamogramm.                    |
| p. S30, References                                                                                                   |

## Experimental Procedures

### $\text{K}_2[\text{Fe}_2(\text{adt})(\text{CO})_4(\text{CN})_2]$ , $\text{K}_2[\mathbf{3}]$

A two-necked Schlenk flask was charged with  $\text{Fe}_2(\text{adt})(\text{CO})_6$  (0.1 g, 0.26 mmol) and KCN (0.050 g, 0.78 mmol) and suspended in MeCN (20 mL). The mixture was refluxed for 6 h and was monitored by IR for completion. The mixture was filtered through Celite and the filtrate was dried under vacuum. The resulting solid was washed with  $\text{Et}_2\text{O}$  (20 mL) and hexanes (20 mL) and dried under vacuum. Yield 0.090 g (76%). IR (MeCN,  $\text{cm}^{-1}$ ):  $\nu_{\text{CN}} = 2078$ ;  $\nu_{\text{CO}} = 1969, 1929, 1893$ .

### $(\text{Et}_4\text{N})_2[\text{Fe}_2(\text{pdt})(\text{CO})_4(\text{CNBPh}_3)_2]$ , $(\text{Et}_4\text{N})_2[\mathbf{1}(\text{BPh}_3)_2]$

A solution of  $(\text{Et}_4\text{N})_2[\mathbf{1}]$  (0.50 g, 0.78 mmol) in  $\text{CH}_2\text{Cl}_2$  (20 mL) was treated with a solution of  $\text{BPh}_3$  (0.38 g, 1.6 mmol) in 20 mL  $\text{CH}_2\text{Cl}_2$  dropwise. The solvent was evaporated to yield a red oil that was extracted into  $\text{CH}_2\text{Cl}_2$  (10 mL), layered with pentane (30 mL) and cooled at  $-30^\circ\text{C}$  for two days producing a red oil. The filtrate was decanted off and the oil was triturated with pentane (3 x 10 mL) to produce a red solid. Yield 0.83 g (94%). Anal. Calcd for  $\text{C}_{61}\text{B}_2\text{Fe}_2\text{S}_2\text{H}_{76}\text{O}_4\text{N}_4$  (found): C, 65.03 (65.38); H, 6.80 (7.01); N, 4.97 (5.04). IR ( $\text{CH}_2\text{Cl}_2$ ,  $\text{cm}^{-1}$ ):  $\nu_{\text{CN}} = 2137$ ;  $\nu_{\text{CO}} = 1984, 1946, 1911$ .  $^{11}\text{B}$  NMR ( $\text{CD}_2\text{Cl}_2$ )  $\delta$ -4.5.  $^1\text{H}$  NMR ( $\text{CD}_2\text{Cl}_2$ ):  $\delta$ 7.50 (12H, d, *o*-ArH);  $\delta$ 7.13 (12H, t, *m*-ArH);  $\delta$ 7.01 (6H, t, *p*-ArH);  $\delta$ 2.44 (16H, m,  $(\text{CH}_3\text{CH}_2)_4\text{N}$ ),  $\delta$ 1.96 (4H, t,  $\text{SCH}_2\text{CH}_2\text{CH}_2\text{S}$ ),  $\delta$ 1.72 (2H, m,  $\text{SCH}_2\text{CH}_2\text{CH}_2$ ),  $\delta$ 0.84 (24H, t,  $(\text{CH}_3\text{CH}_2)_4\text{N}$ ).

### $(\text{Et}_4\text{N})_2[\text{Fe}_2(\text{adt})(\text{CO})_4(\text{CNBPh}_3)_2]$ , $(\text{Et}_4\text{N})_2[\mathbf{3}(\text{BPh}_3)_2]$

A solution of  $(\text{Et}_4\text{N})_2[\mathbf{3}]$  (0.050 g, 0.078 mmol) in  $\text{CH}_2\text{Cl}_2$  (10 mL) was treated with a solution of  $\text{BPh}_3$  (0.038 g, 0.16 mmol) in 10 mL  $\text{CH}_2\text{Cl}_2$  dropwise. The mixture was filtered through celite and the solvent was evaporated to yield a red oil. The oil was triturated with pentane (3 x 10 mL) to produce a red solid. Yield 0.070 g (80%). Anal. Calcd for  $\text{C}_{60}\text{B}_2\text{Fe}_2\text{S}_2\text{H}_{75}\text{O}_4\text{N}_5$  (found): C, 63.90 (63.75); H, 6.70 (6.85); N, 6.21 (5.85). IR ( $\text{CH}_2\text{Cl}_2$ ,  $\text{cm}^{-1}$ ):  $\nu_{\text{CN}} = 2136$ ;  $\nu_{\text{CO}} = 1986, 1949, 1914$ .

### $\text{Et}_4\text{N}[\text{Fe}_2(\mu\text{-H})(\text{pdt})(\text{CO})_4(\text{CNBPh}_3)_2]$ , $\text{Et}_4\text{N}[\mathbf{H1}(\text{BPh}_3)_2]$

A solution of  $(\text{Et}_4\text{N})_2[\mathbf{1}(\text{BPh}_3)_2]$  (100 mg, 0.089 mmol) in  $\text{CH}_2\text{Cl}_2$  (3 mL) was treated with HCl in ether (0.087 mL, 2 M, 0.178 mmol) resulting in the color of the solution lightening and some precipitate forming. The reaction solution was cooled in a  $-30^\circ\text{C}$  freezer to precipitate  $\text{Et}_4\text{NCl}$  from solution and was then passed through a plug of celite. The solution was dried under vacuum and the resulting oil was triturated with pentane (3x10 mL) and left to dry under vacuum overnight, yielding a red solid. Yield 85 mg (96 %). IR ( $\text{CH}_2\text{Cl}_2$ ,  $\text{cm}^{-1}$ )  $\nu_{\text{CN}} = 2180$ ;  $\nu_{\text{CO}} = 2064, 2043, 2009$ .  $^1\text{H}$  NMR ( $\text{CD}_2\text{Cl}_2$ ):  $\delta$  -13.2 (s Fe-H),  $\delta$  -16.1 (s Fe-H),  $\delta$  -19.2 (s Fe-H).

**Table S1.**  $\text{pK}_a$  Determination of  $(\text{Et}_4\text{N})_2[\mathbf{1}(\text{BAR}^{\text{F}}_3)_2]$  with  $\text{PhNH}_3\text{BAR}^{\text{F}24}$  in MeCN.

| Run | Initial HB | Initial $[\mathbf{1}(\text{BR}_3)_2]^{2\ominus}$ | Eq $[\mathbf{1}(\text{BR}_3)_2]^{2\ominus}$ | Eq $[\mathbf{H1}(\text{BR}_3)_2]^\ominus$ | Eq HB | Eq B | $\text{pK}_a$ |
|-----|------------|--------------------------------------------------|---------------------------------------------|-------------------------------------------|-------|------|---------------|
| 1   | 1.07       | 1                                                | 0.40                                        | 0.60                                      | 0.47  | 0.60 | 10.9          |
| 2   | 0.40       | 1                                                | 0.71                                        | 0.29                                      | 0.11  | 0.29 | 10.7          |
| 3   | 1.91       | 1                                                | 0.26                                        | 0.74                                      | 1.17  | 0.74 | 10.9          |

$$\text{pK}_a^{\text{MeCN}} = 10.8 \pm 0.2$$

**Table S2.**  $\text{pK}_a$  Determination of  $(\text{Et}_4\text{N})_2[\mathbf{1}(\text{BAR}^{\text{F}\#}_3)_2]$  with  $\text{PyHBAR}^{\text{F}24}$  in MeCN.

| Run | Initial HB | Initial $[\mathbf{1}(\text{BR}_3)_2]^{2\ominus}$ | Eq $[\mathbf{1}(\text{BR}_3)_2]^{2\ominus}$ | Eq $[\mathbf{H1}(\text{BR}_3)_2]^\ominus$ | Eq HB | Eq B | $\text{pK}_a$ |
|-----|------------|--------------------------------------------------|---------------------------------------------|-------------------------------------------|-------|------|---------------|
| 1   | 1.33       | 1                                                | 0.16                                        | 0.84                                      | 0.49  | 0.84 | 13.5          |
| 2   | 0.66       | 1                                                | 0.42                                        | 0.58                                      | 0.08  | 0.58 | 13.5          |
| 3   | 2.08       | 1                                                | 0.09                                        | 0.91                                      | 1.17  | 0.91 | 13.4          |

$$\text{pK}_a^{\text{MeCN}} = 13.5 \pm 0.1$$

**Table S3.** Selected Bond Distances of  $[\mathbf{1}(\text{BAr}_3^{\text{F}})_2]^{2\Box}$  and  $[\mathbf{1}]^{2\Box, 1}$ 

| Bond Distances (Å)   | $[\mathbf{1}(\text{BAr}_3^{\text{F}})_2]^{2\Box}$ | $[\mathbf{1}]^{2\Box}$ |
|----------------------|---------------------------------------------------|------------------------|
| Fe-Fe                | 2.519(1)                                          | 2.517(2)               |
| Fe-CN <sub>avg</sub> | 1.873(6)                                          | 1.93(1)                |
| C≡N <sub>avg</sub>   | 1.158(8)                                          | 1.16(2)                |
| Fe-CO <sub>avg</sub> | 1.761(10)                                         | 1.74(2)                |
| C≡O <sub>avg</sub>   | 1.156(10)                                         | 1.17(3)                |

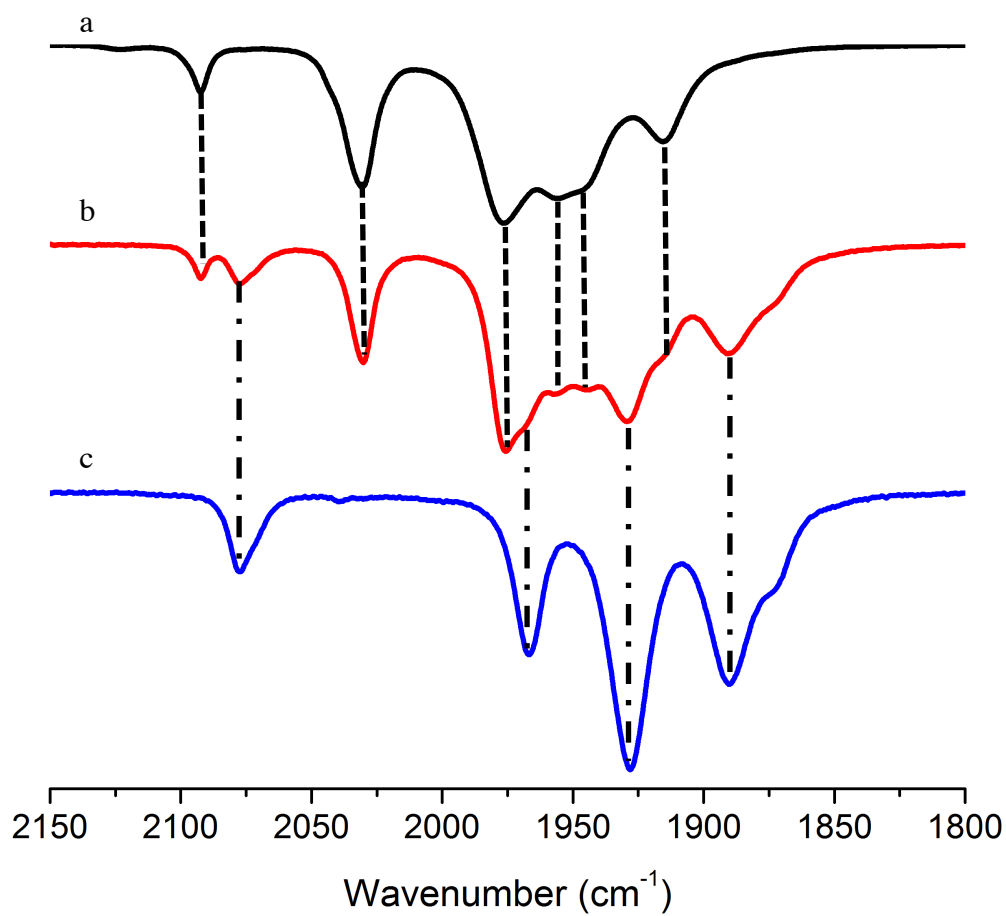Figure S1. IR spectra in MeCN at 20°C. of a) K[2], b) reaction mixture for the synthesis of K<sub>2</sub>[1] and c) K<sub>2</sub>[1].

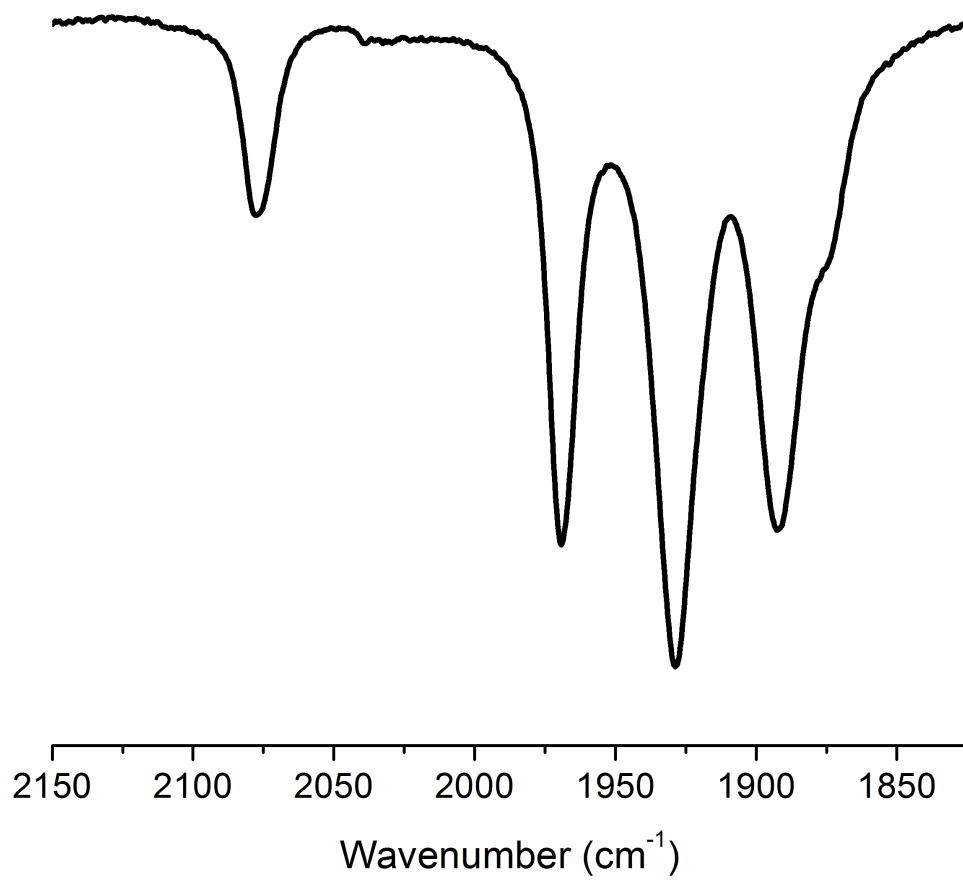

Figure S2. IR spectrum of K<sub>2</sub>[**3**] in MeCN at 20°C.

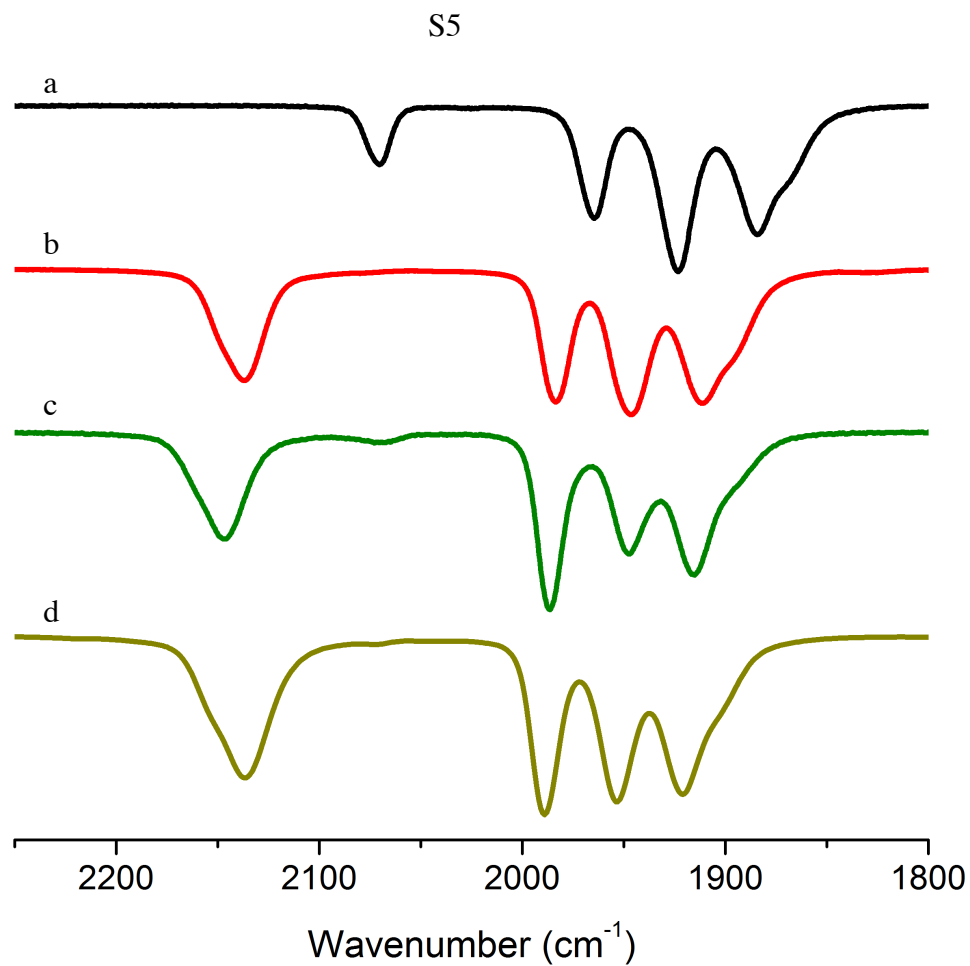

Figure S3. IR spectra of  $(\text{Et}_4\text{N})_2[\mathbf{1}(\text{BR}_3)_2]$  complexes in  $\text{CH}_2\text{Cl}_2$  at  $20^\circ\text{C}$ . a)  $(\text{Et}_4\text{N})_2[\mathbf{1}]$ , b)  $(\text{Et}_4\text{N})_2[\mathbf{1}(\text{BPh}_3)_2]$ , c)  $(\text{Et}_4\text{N})_2[\mathbf{1}(\text{BAr}^{\text{F}\#}_3)_2]$ , d)  $(\text{Et}_4\text{N})_2[\mathbf{1}(\text{BAr}^{\text{F}}_3)_2]$ .

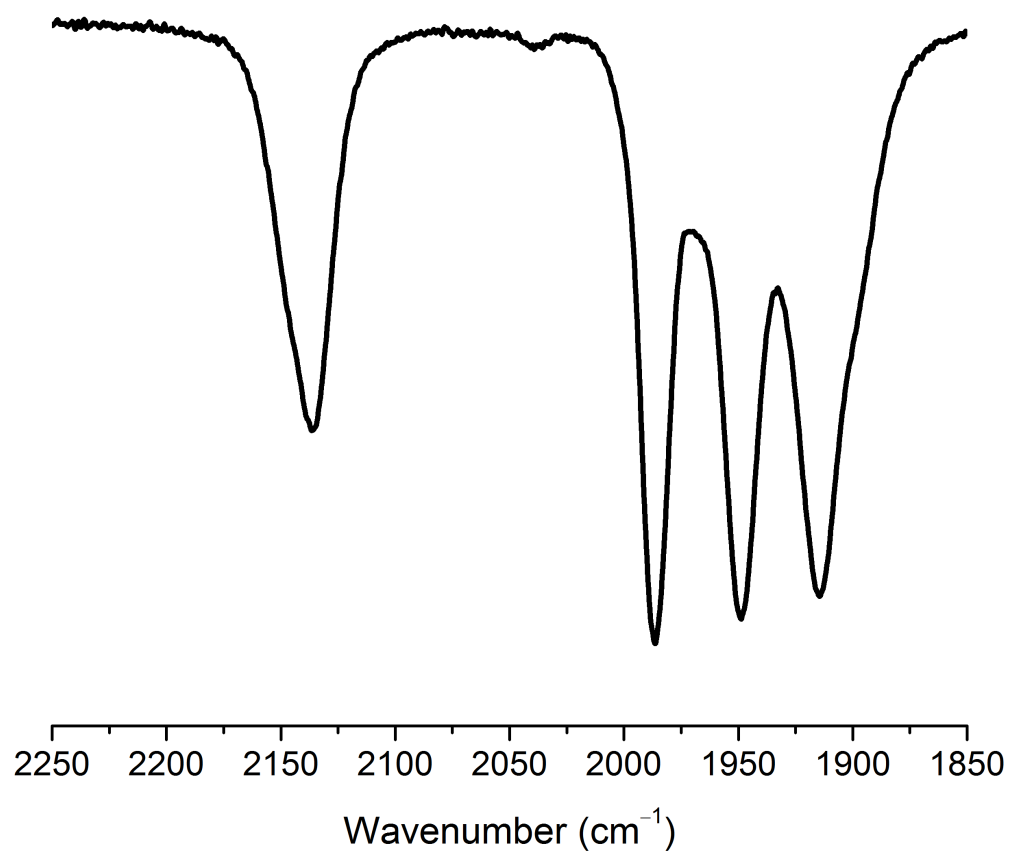

Figure S4. IR spectra of  $(\text{Et}_4\text{N})_2[\mathbf{3}(\text{BPh}_3)_2]$  in  $\text{CH}_2\text{Cl}_2$  at  $20^\circ\text{C}$ .

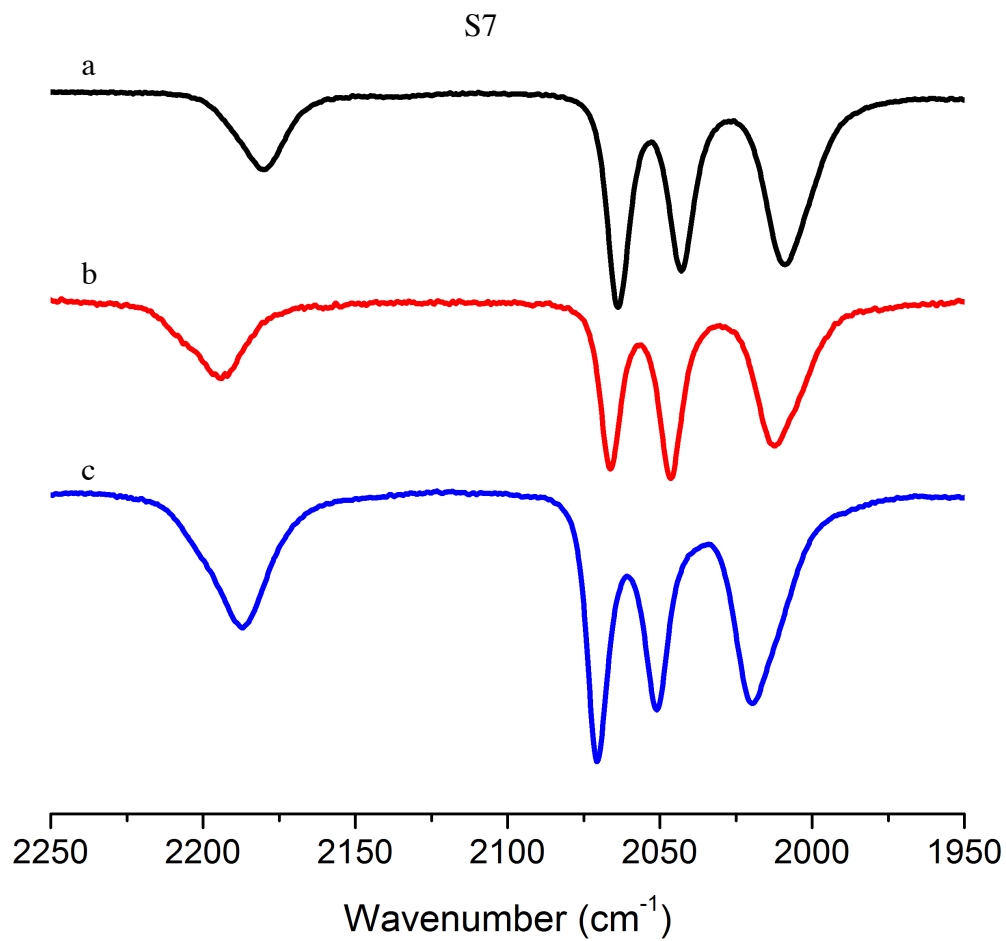

Figure S5. IR spectra of Et<sub>4</sub>N[H1(BR<sub>3</sub>)<sub>2</sub>] complexes in CH<sub>2</sub>Cl<sub>2</sub> at 20°C. a) Et<sub>4</sub>N[H1(BPh<sub>3</sub>)<sub>2</sub>], b) Et<sub>4</sub>N[H1(BAr<sup>F#</sup><sub>3</sub>)<sub>2</sub>], c) Et<sub>4</sub>N[H1(BAr<sup>F</sup><sub>3</sub>)<sub>2</sub>].

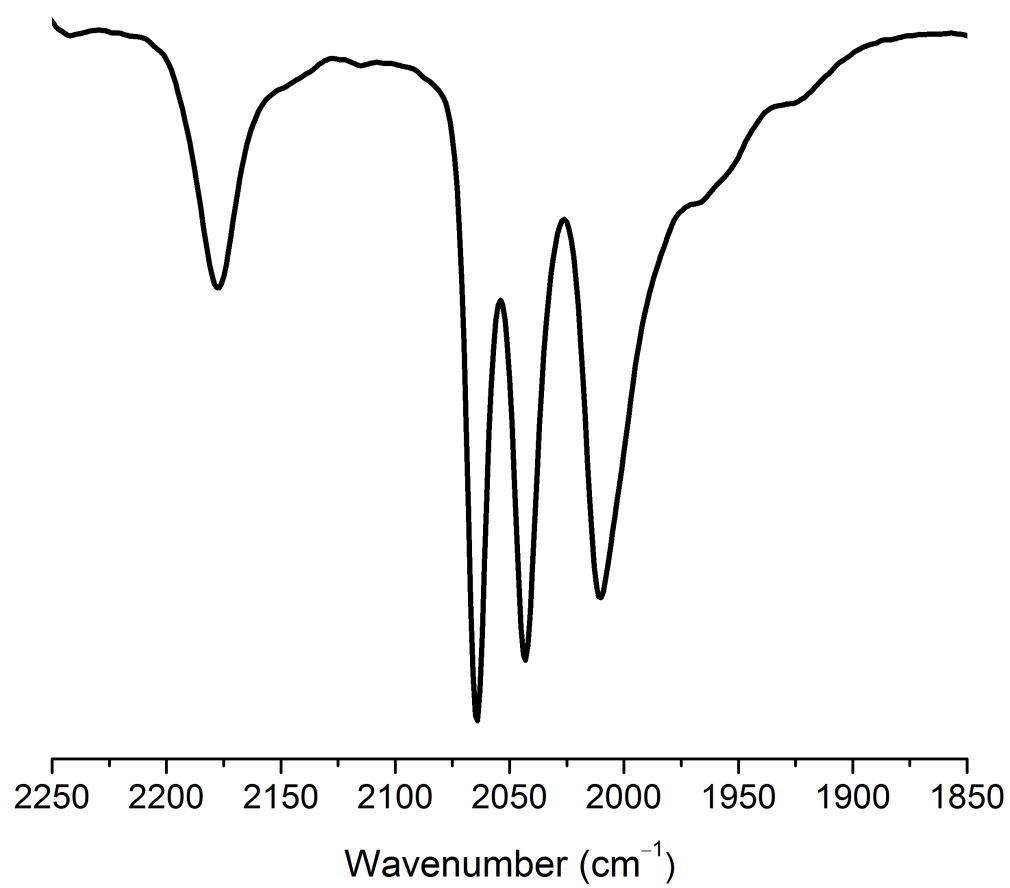

Figure S6. IR spectra of Et<sub>4</sub>N[H**3**(BPh<sub>3</sub>)<sub>2</sub>] in CH<sub>2</sub>Cl<sub>2</sub> at 20°C.



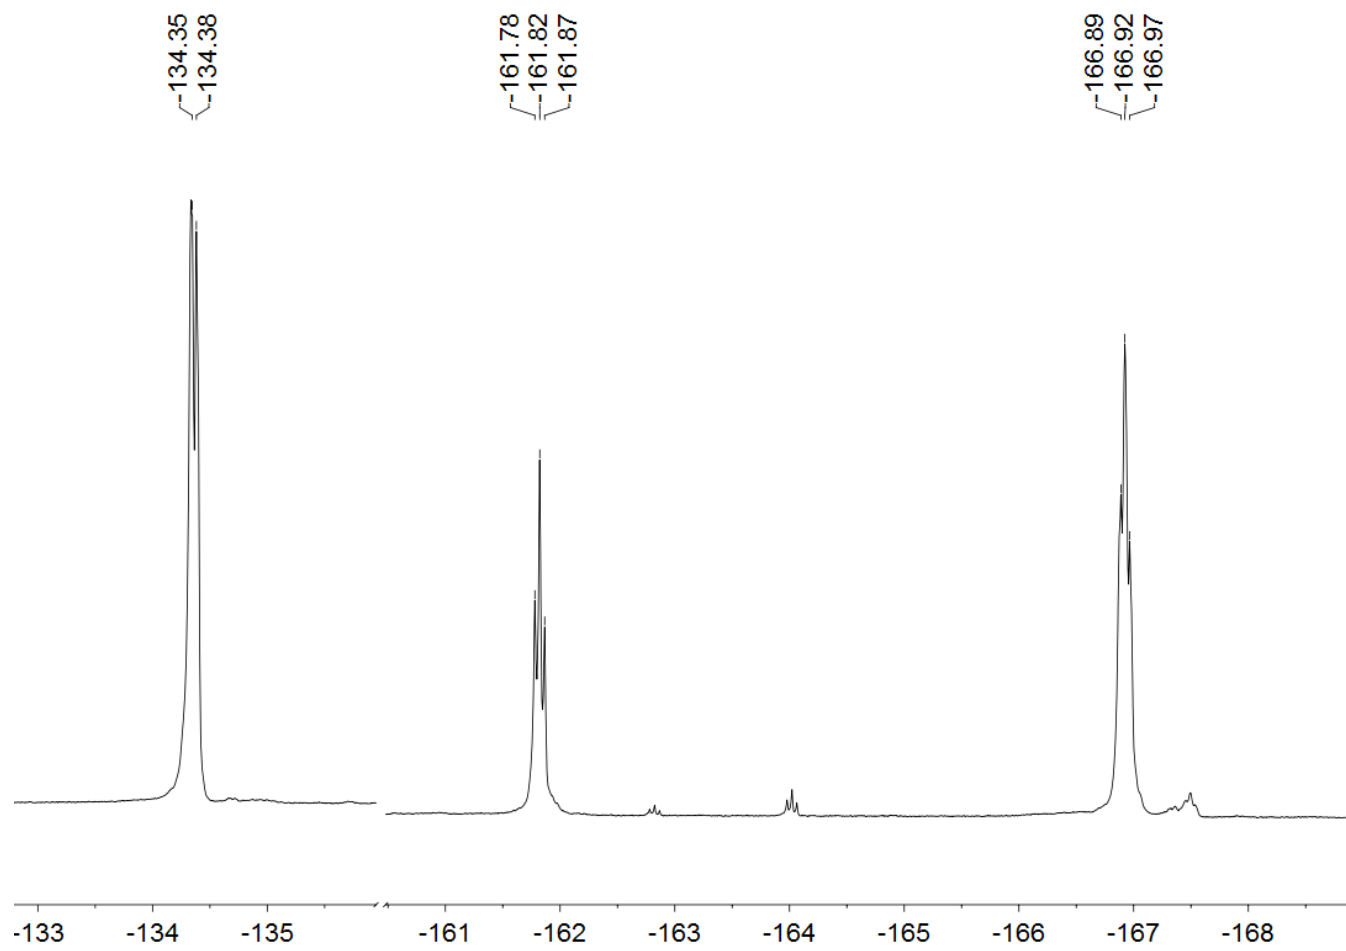

Figure S7.  $^{19}\text{F}$  NMR of  $(\text{Et}_4\text{N})_2[\mathbf{1}(\text{BAr}^{\text{F}}_3)_2]$  in  $\text{CD}_2\text{Cl}_2$  at  $20^\circ\text{C}$ .

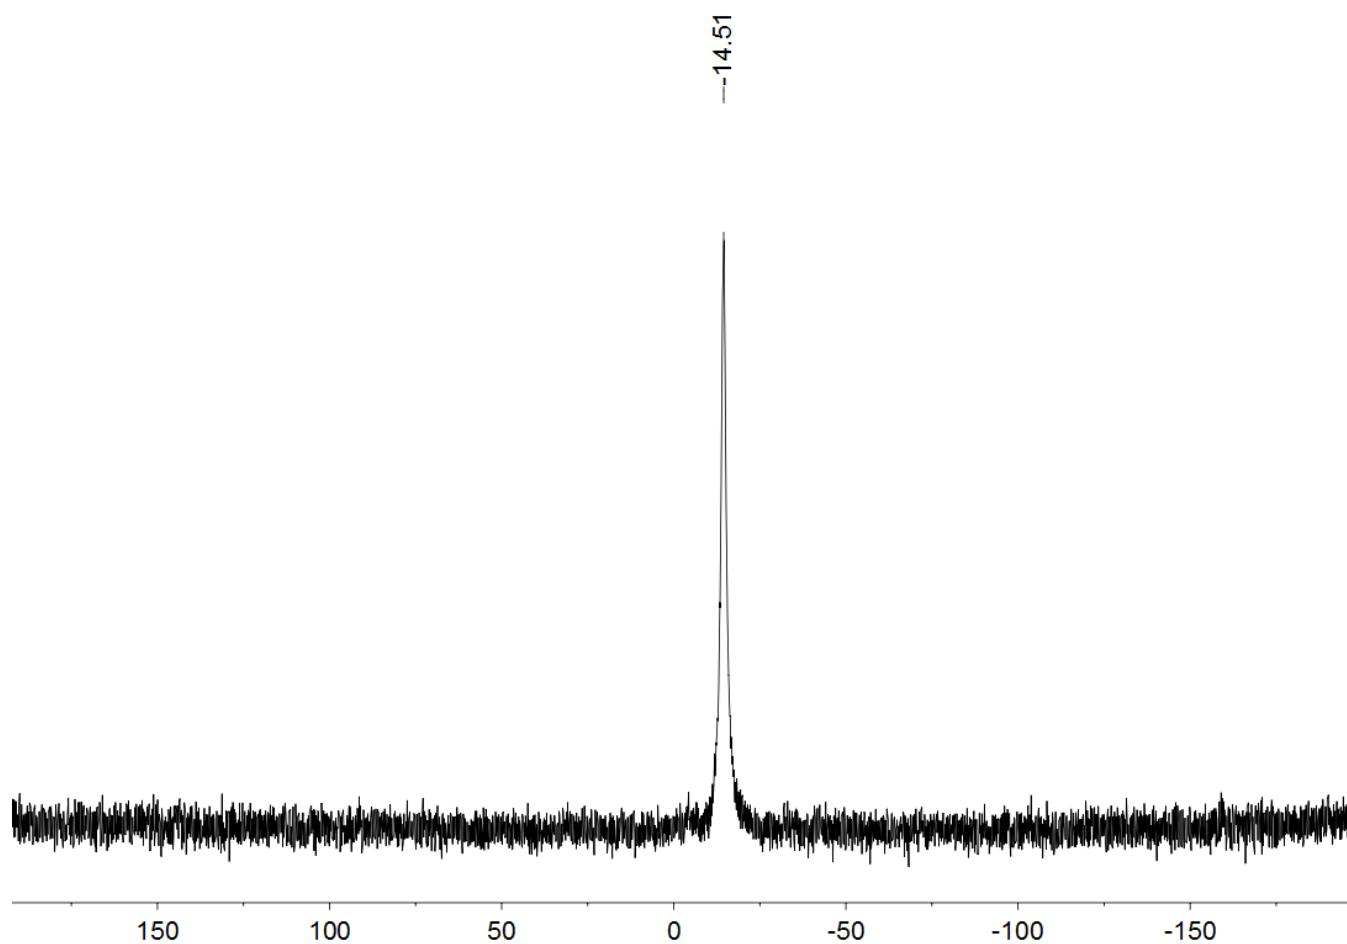

Figure S8.  $^{11}\text{B}$  NMR of  $(\text{Et}_4\text{N})_2[\mathbf{1}(\text{BAr}^{\text{F}}_3)_2]$  in  $\text{CD}_2\text{Cl}_2$  at  $20^\circ\text{C}$ .

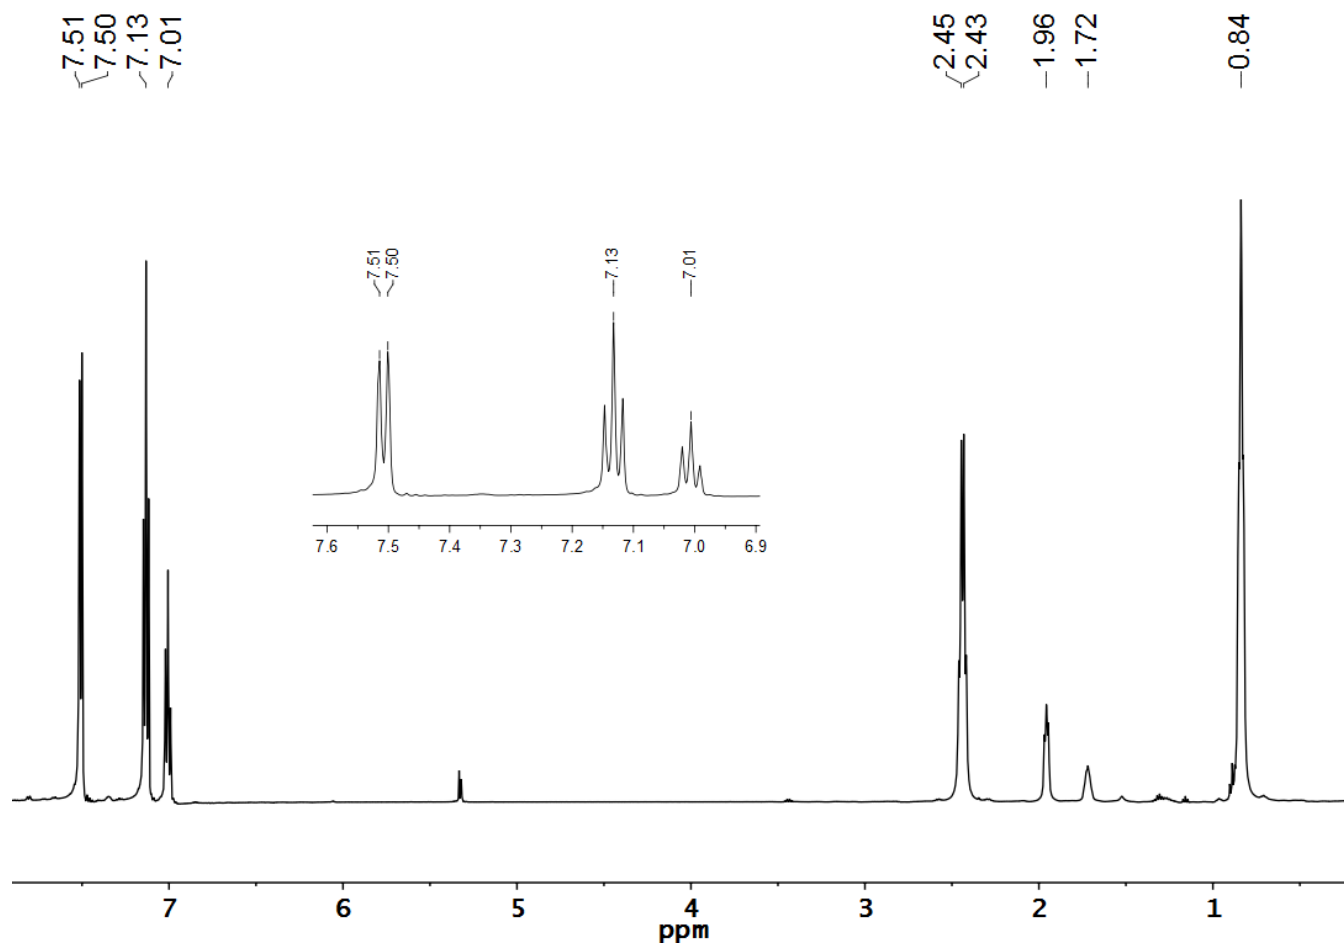

Figure S9.  $^1\text{H}$  NMR of  $(\text{Et}_4\text{N})_2[\mathbf{1}(\text{BPh}_3)_2]$  in  $\text{CD}_2\text{Cl}_2$  at  $20^\circ\text{C}$ . Inset:  $^1\text{H}$  NMR signals of aryl region.

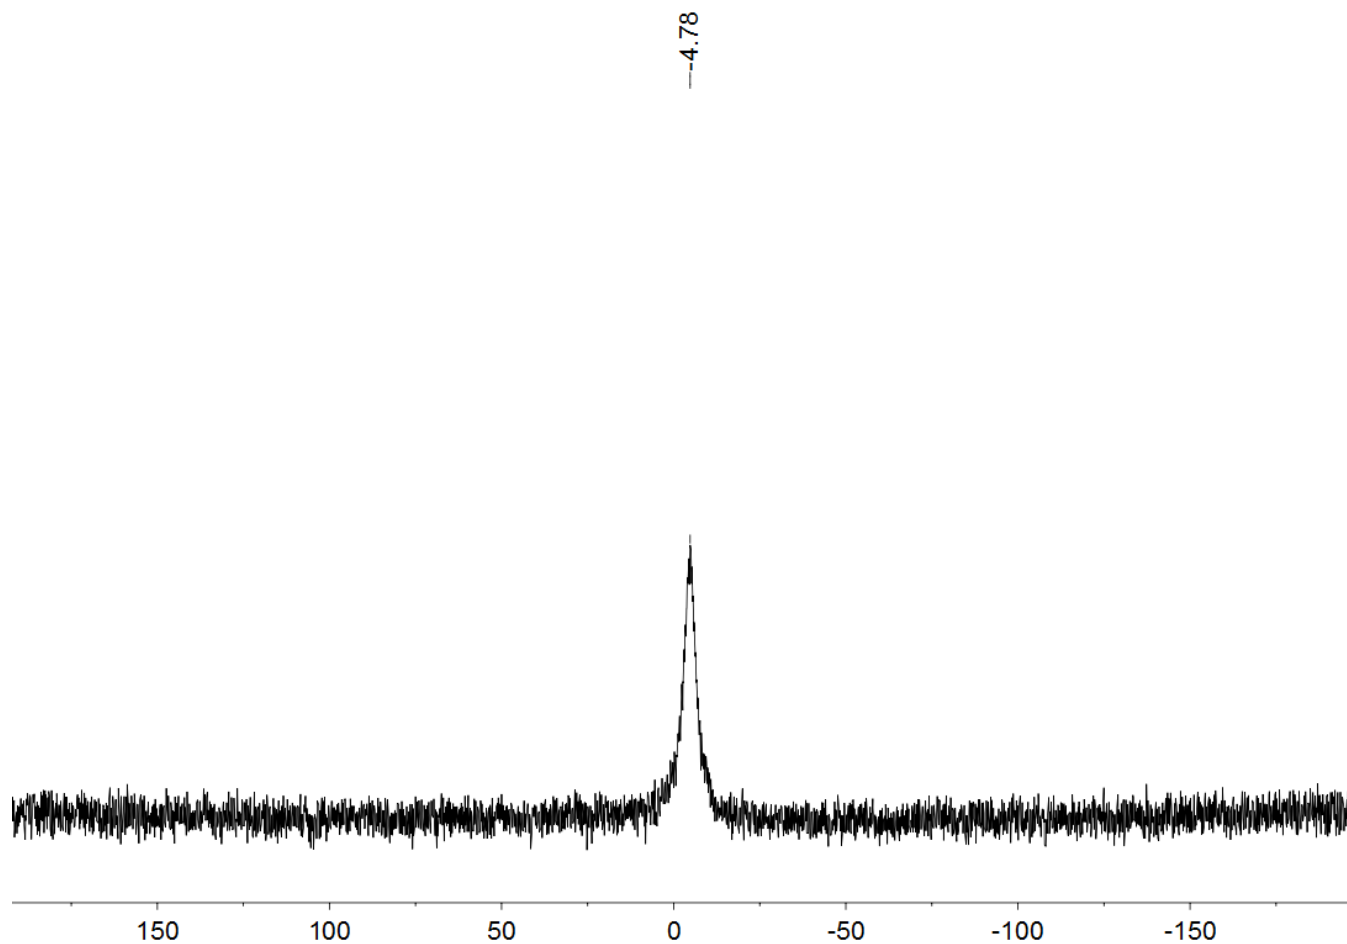

Figure S10.  $^{11}\text{B}$  NMR of  $(\text{Et}_4\text{N})_2[\mathbf{1}(\text{BPh}_3)_2]$  in  $\text{CD}_2\text{Cl}_2$  at  $20^\circ\text{C}$ .

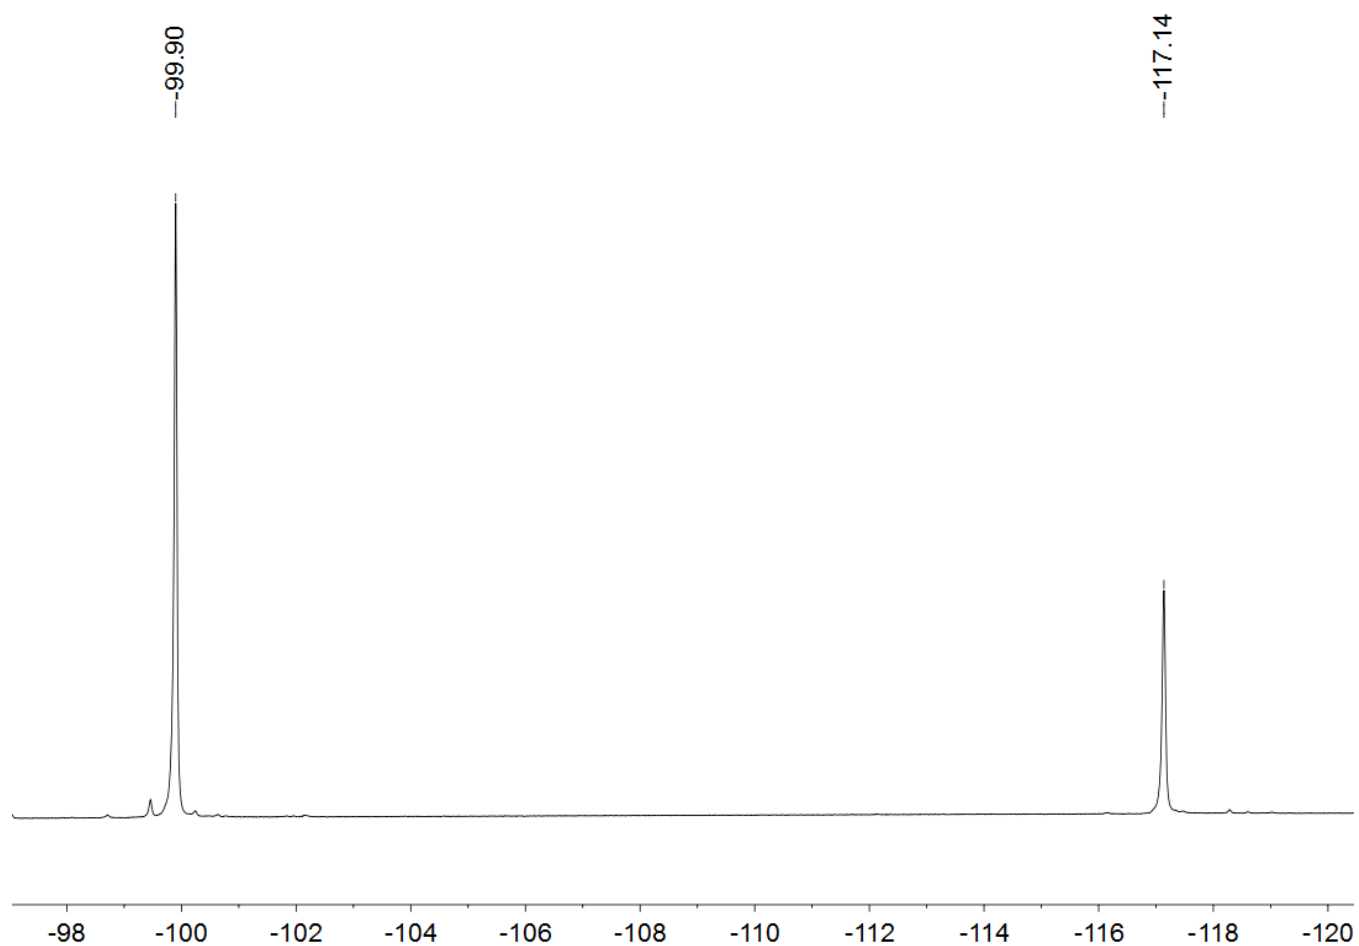

Figure S11.  $^{19}\text{F}$  NMR of  $(\text{Et}_4\text{N})_2[\mathbf{1}(\text{BAr}^{\text{F}\#}_3)_2]$  in  $\text{CD}_2\text{Cl}_2$  at  $20^\circ\text{C}$ .

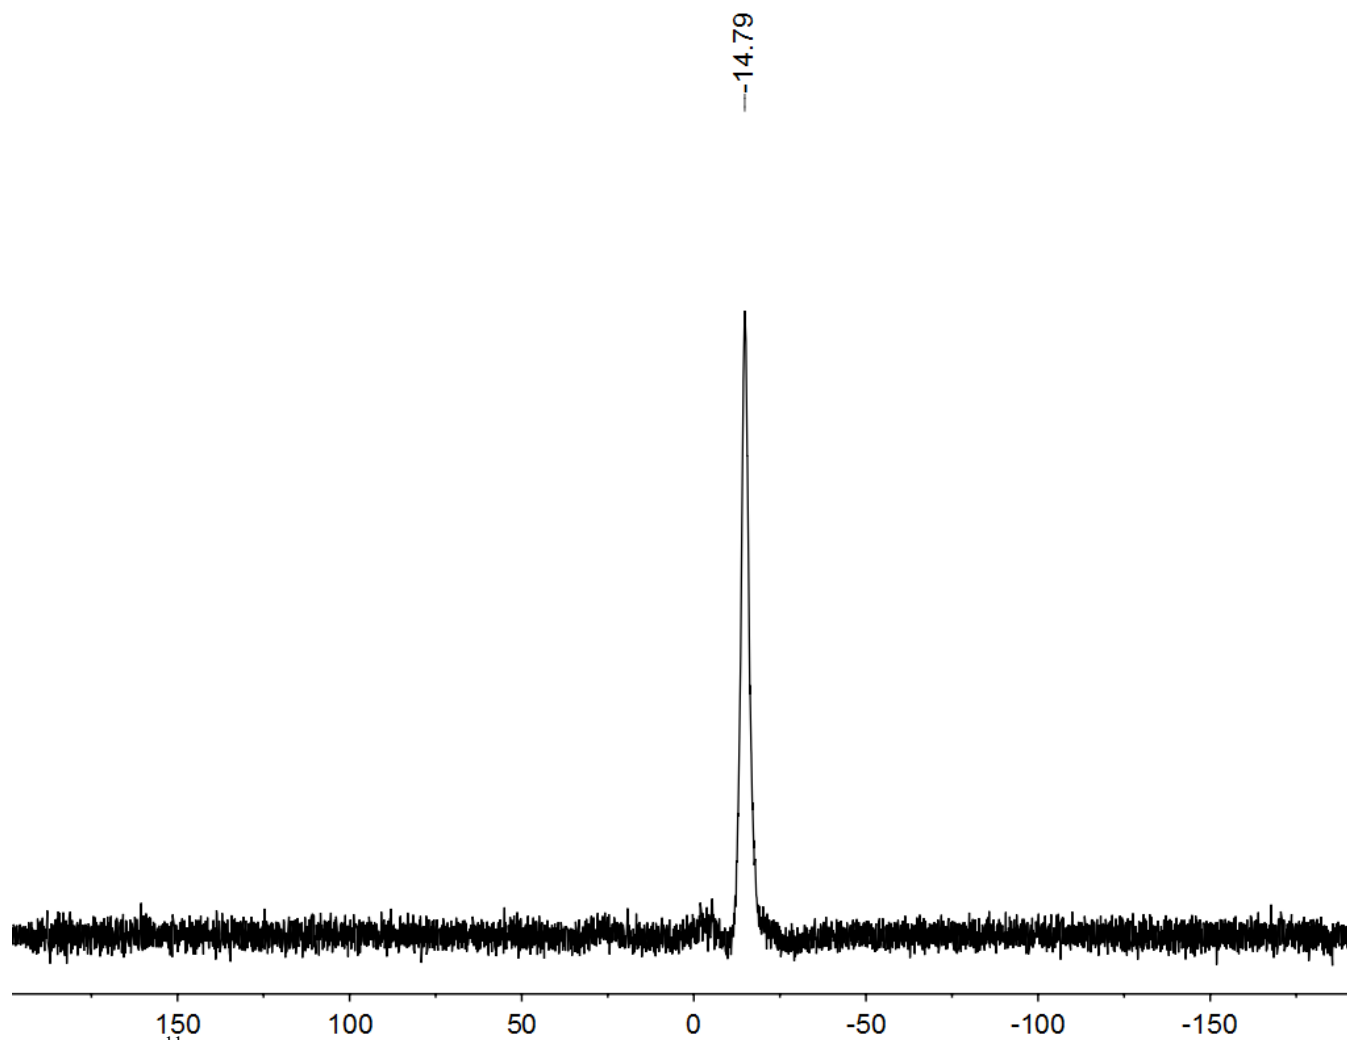

Figure S12.  $^{11}\text{B}$  NMR of  $(\text{Et}_4\text{N})_2[\mathbf{1}(\text{BPh}_3)_2]$  in  $\text{CD}_2\text{Cl}_2$  at  $20^\circ\text{C}$ .

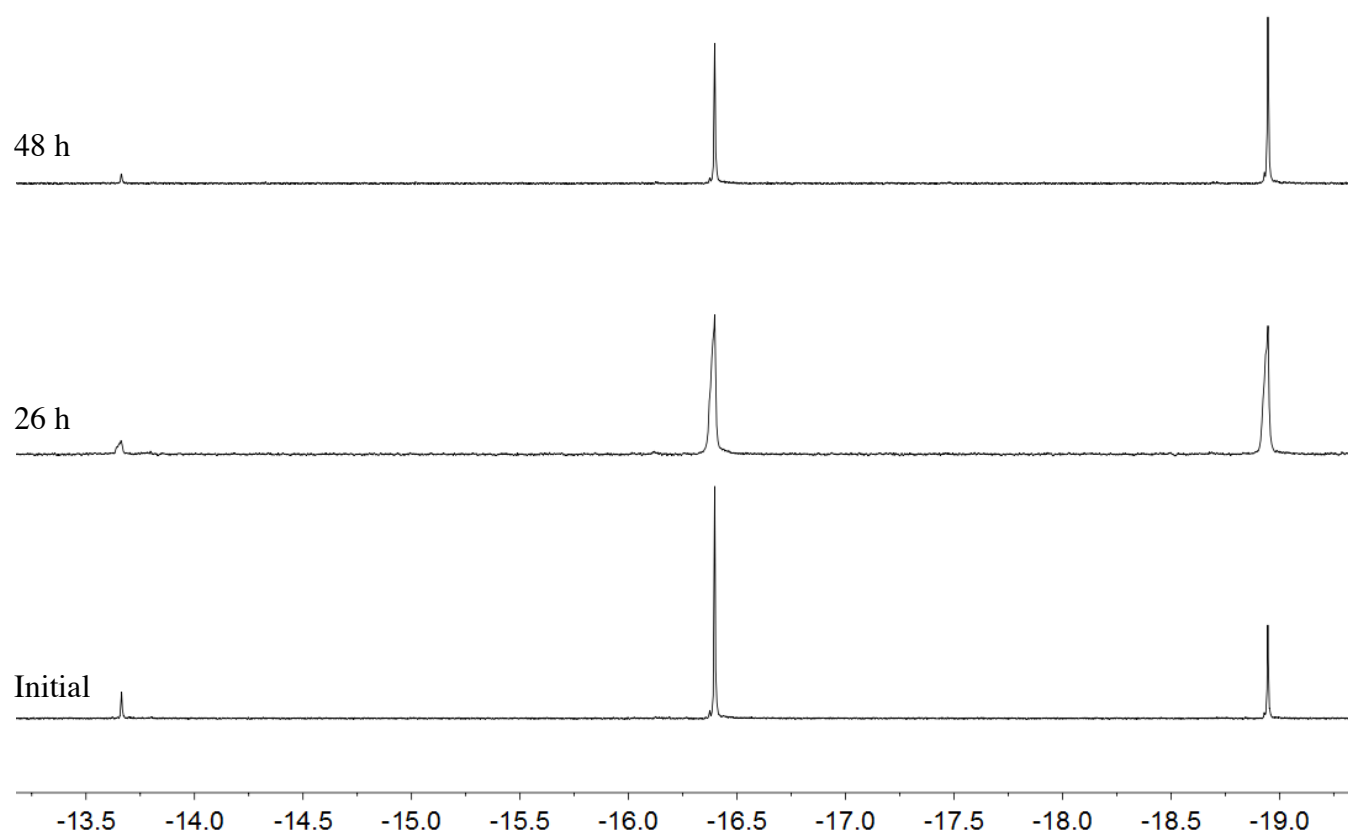

Figure S13. Isomerization of  $\text{Et}_4\text{N}[\text{HI}(\text{BAr}^{\text{F}}_3)_2]$  in  $\text{CD}_2\text{Cl}_2$  by  $^1\text{H}$  NMR at  $20^\circ\text{C}$ .

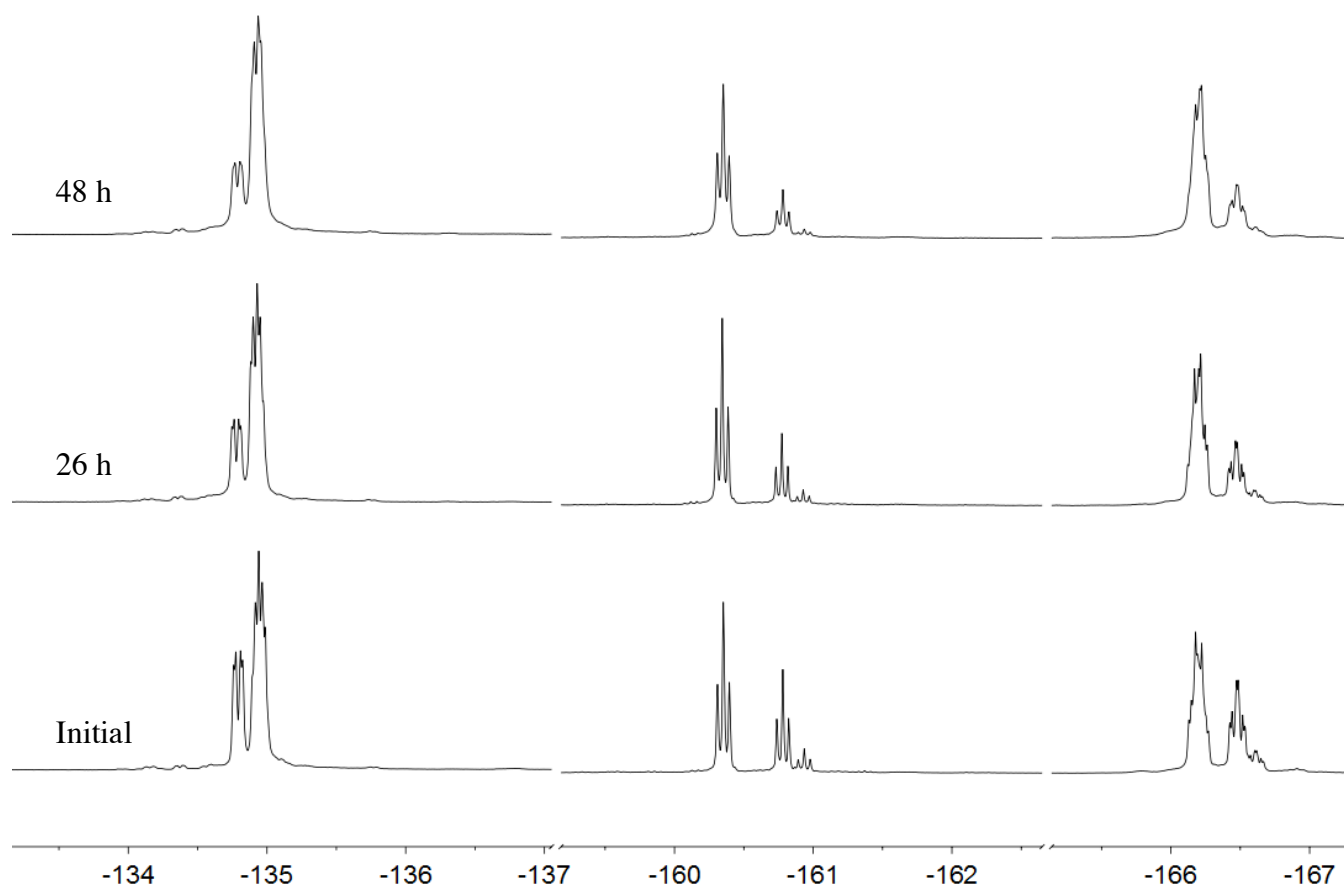

Figure S14. Isomerization of  $\text{Et}_4\text{N}[\text{H1}(\text{BAr}^{\text{F}}_3)_2]$  in  $\text{CD}_2\text{Cl}_2$  by  $^{19}\text{F}$  NMR at  $20^\circ\text{C}$ .



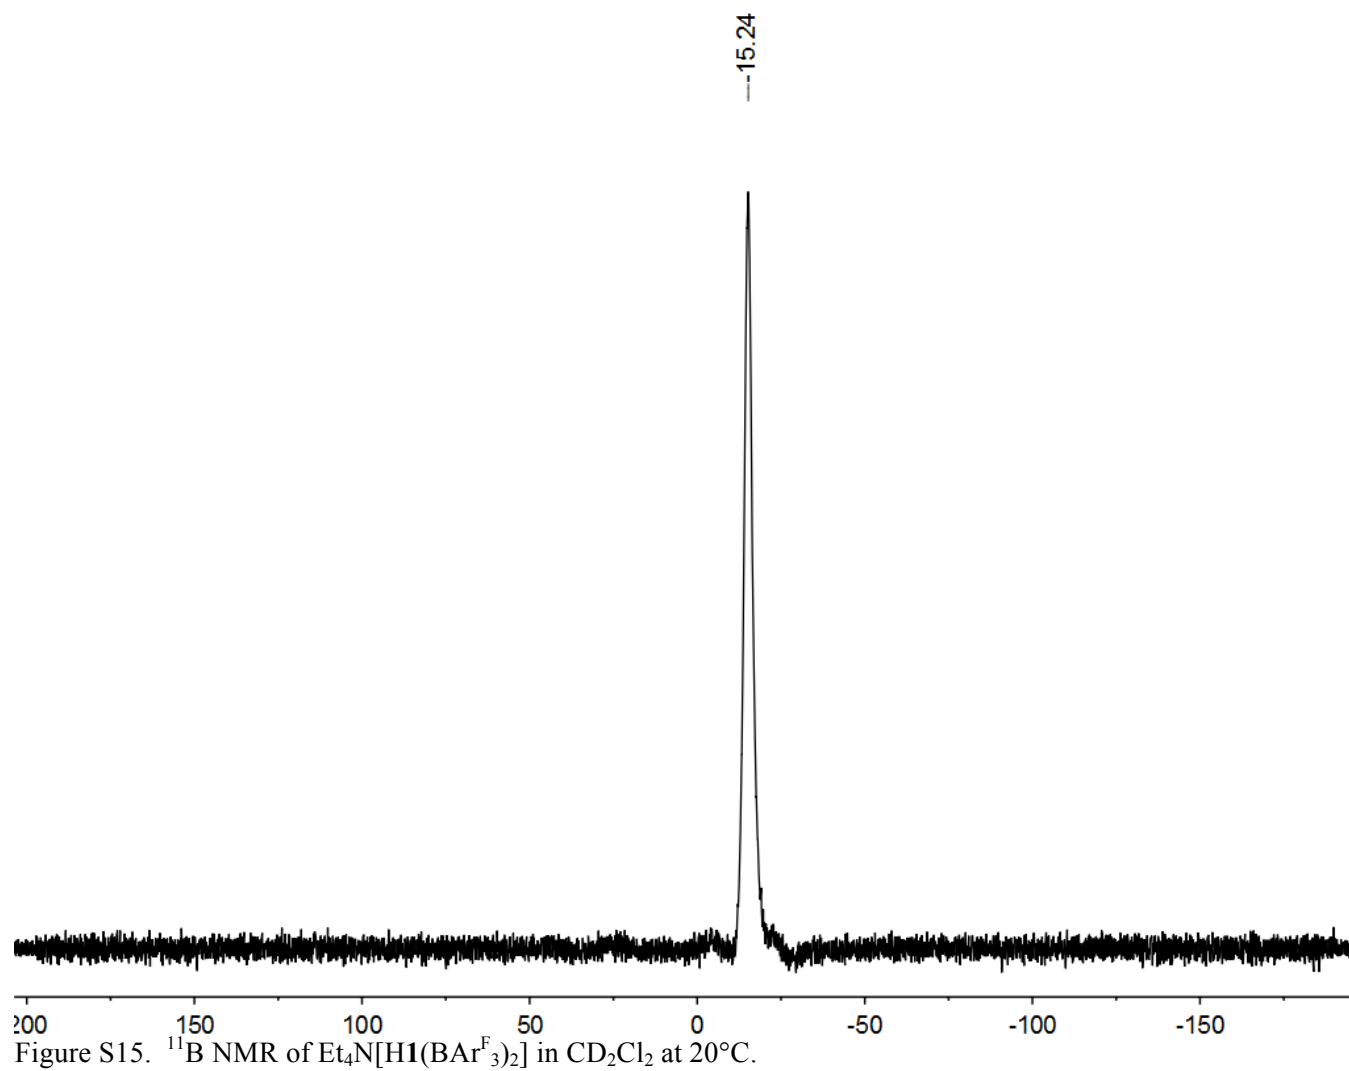

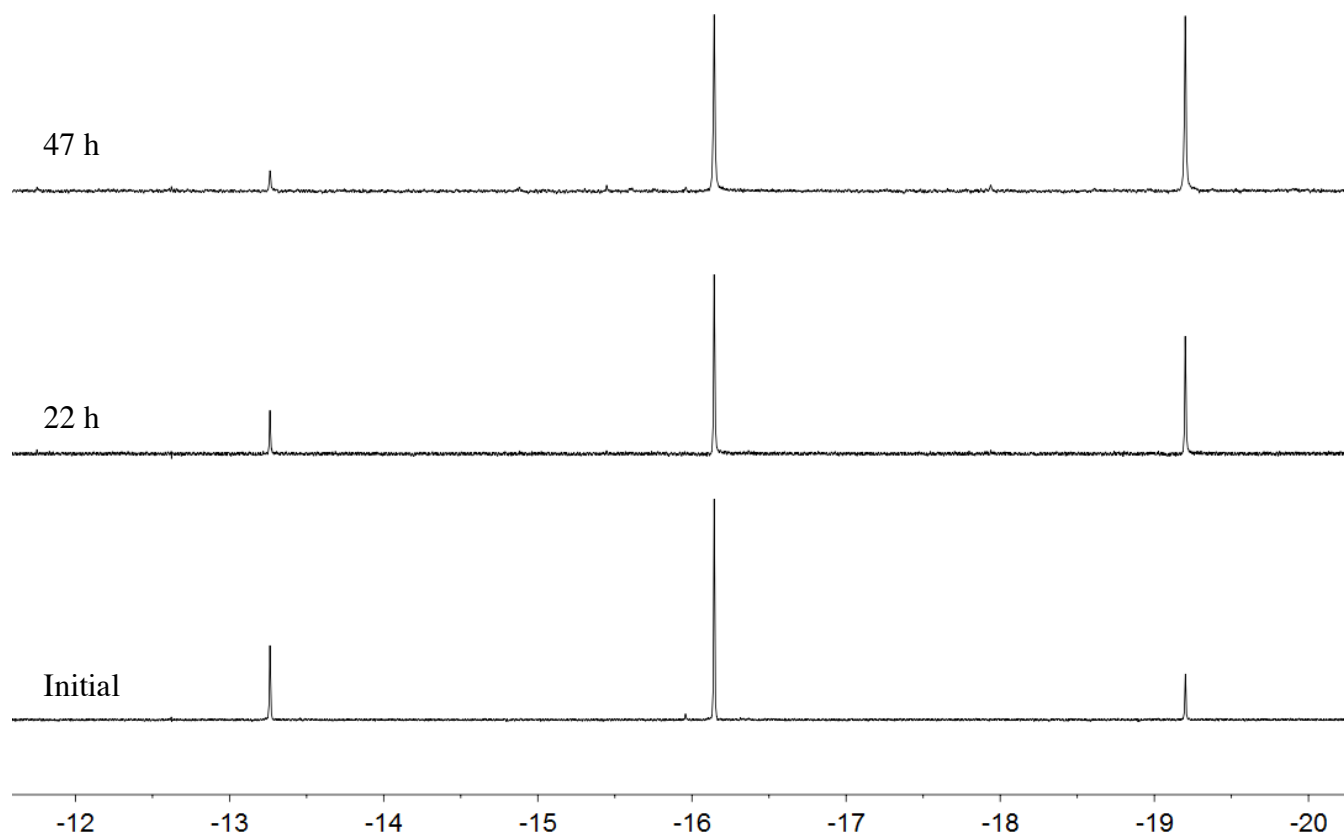

Figure S16. Isomerization of the hydride signals of  $\text{Et}_4\text{N}[\text{H}\mathbf{1}(\text{BAr}^{\text{F}}_3)_2]$  in  $\text{CD}_2\text{Cl}_2$  by  $^1\text{H}$  NMR at  $20^\circ\text{C}$ .

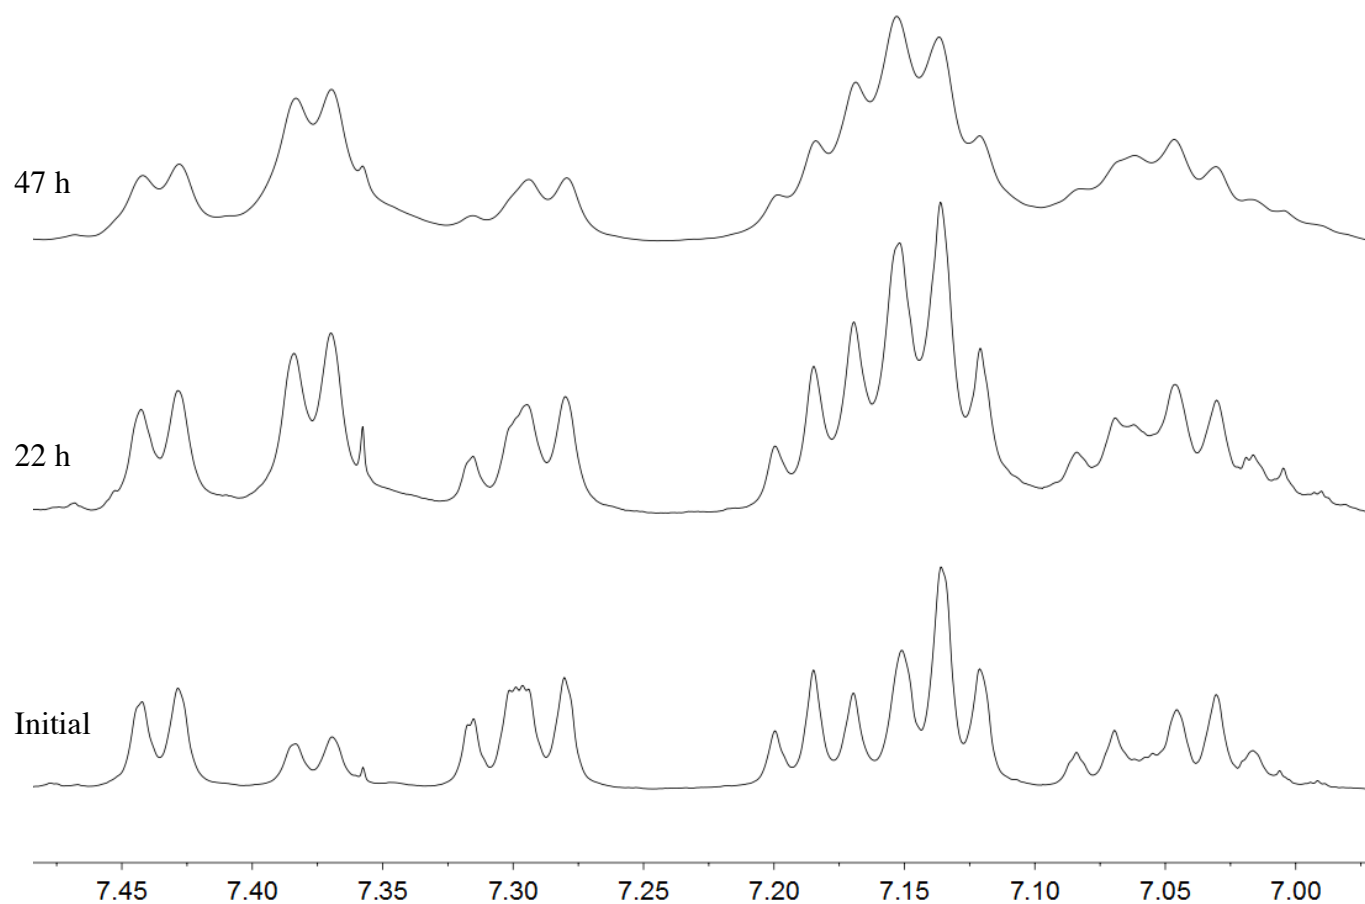

Figure S17. Isomerization of the  $\text{BPh}_3$  signals of  $\text{Et}_4\text{N}[\text{H1}(\text{BAr}^{\text{F}}_3)_2]$  in  $\text{CD}_2\text{Cl}_2$  by  $^1\text{H}$  NMR at  $20^\circ\text{C}$ .

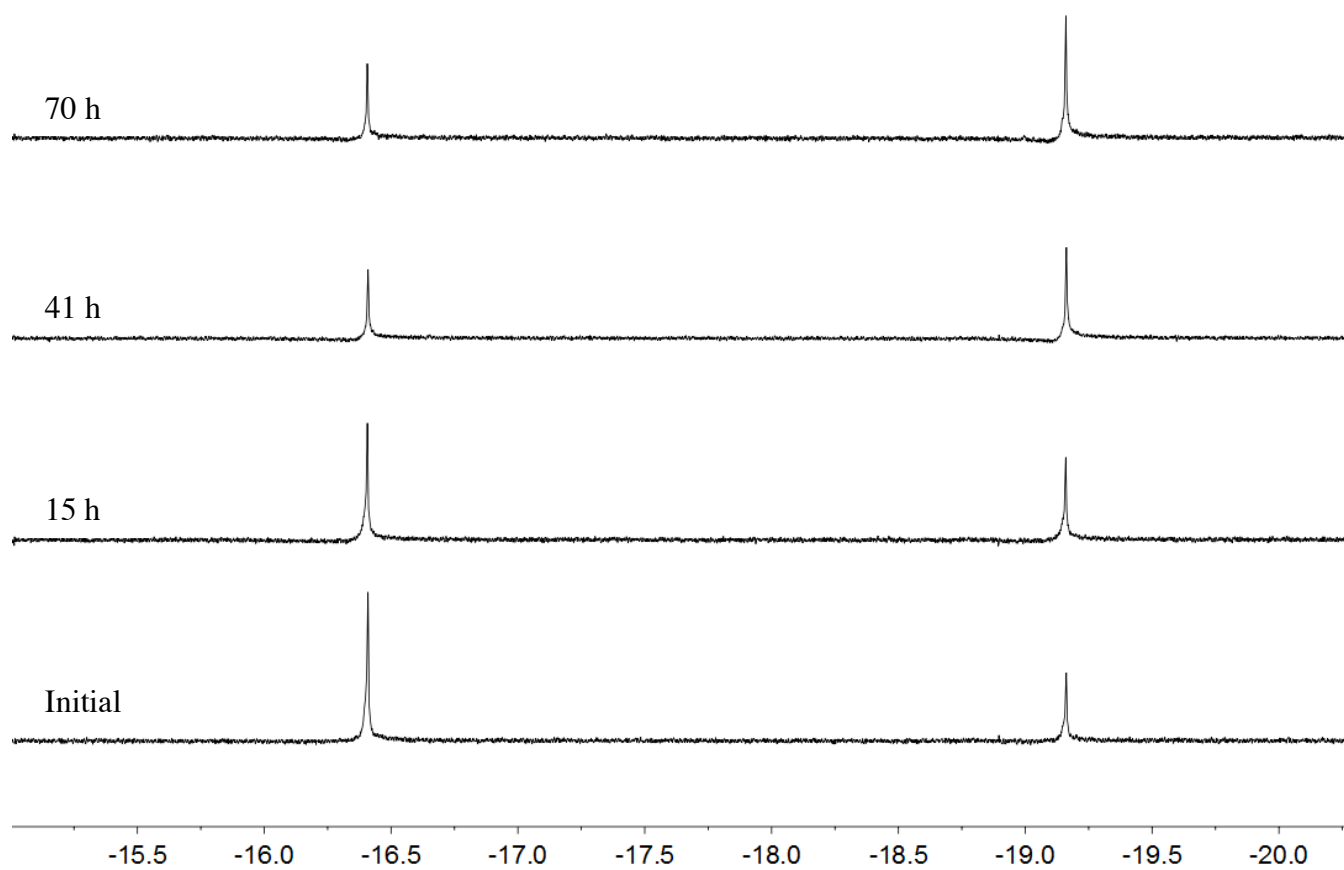

Figure S18. Isomerization of  $\text{Et}_4\text{N}[\text{HI}(\text{BAr}^{\text{F}\#}_3)_2]$  in  $\text{CD}_2\text{Cl}_2$  monitored by  $^1\text{H}$  NMR at  $20^\circ\text{C}$ .

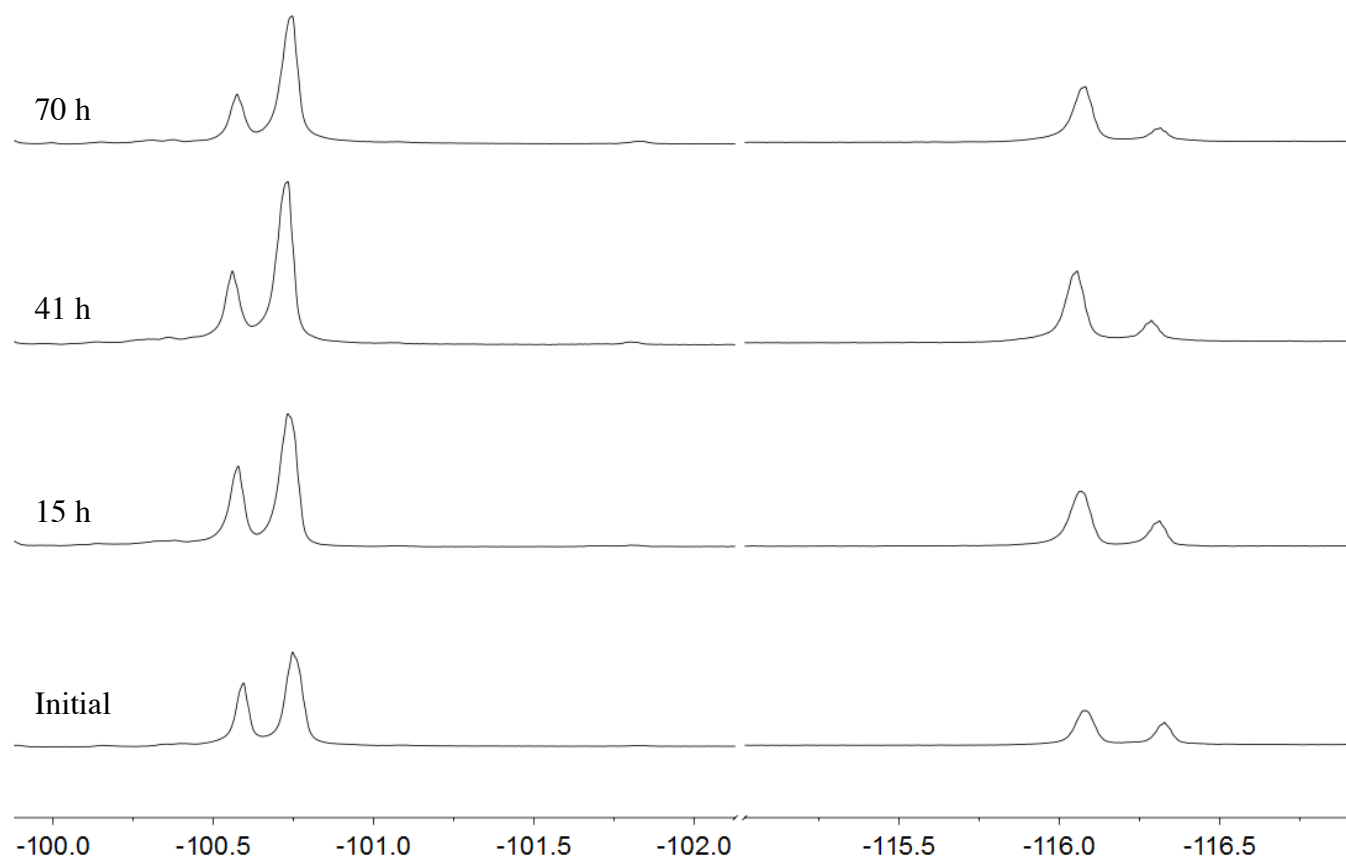

Figure S19. Isomerization of  $\text{Et}_4\text{N}[\text{H1}(\text{BAr}^{\text{F}\#}_3)_2]$  in  $\text{CD}_2\text{Cl}_2$  monitored by  $^{19}\text{F}$  NMR at  $20^\circ\text{C}$ .

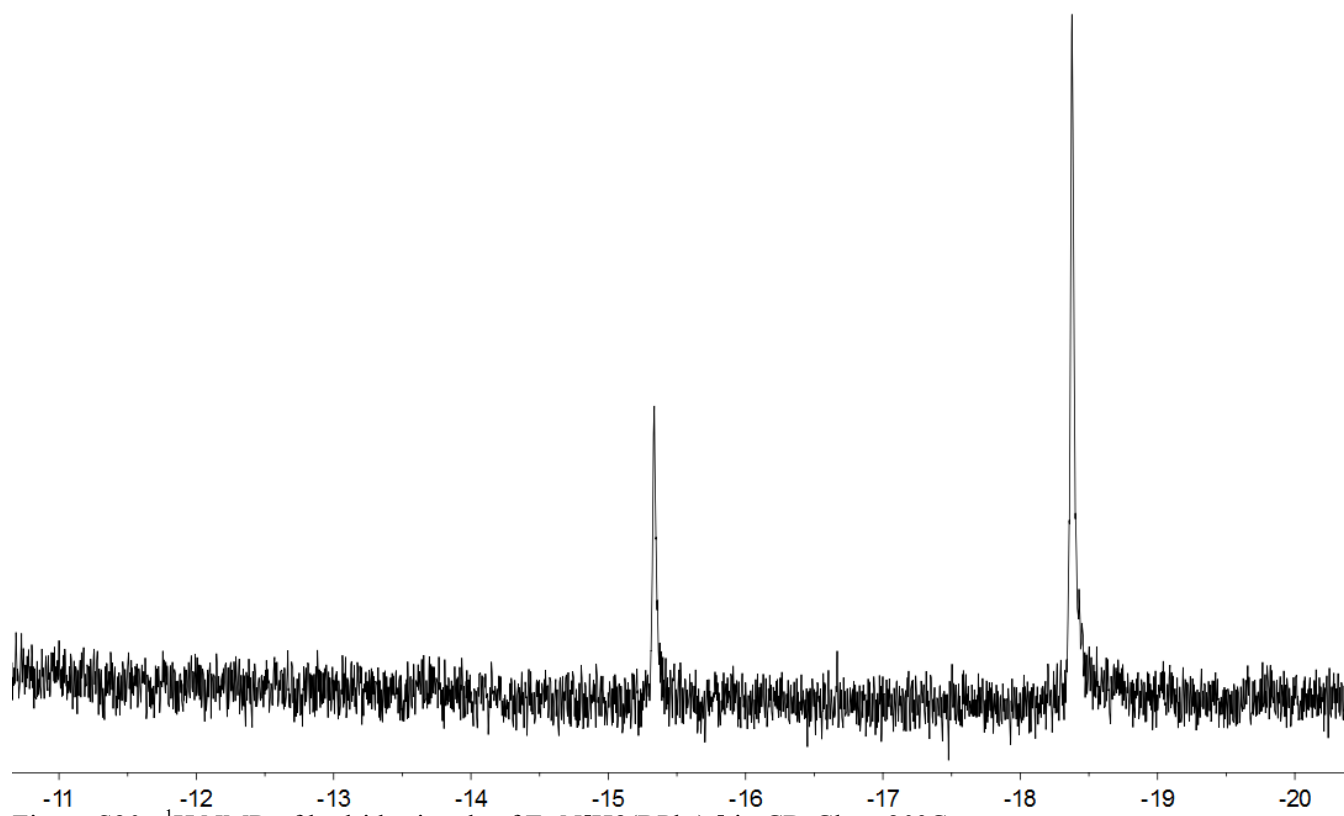

Figure S20.  $^1\text{H}$  NMR of hydride signals of  $\text{Et}_4\text{N}[\text{H}_3(\text{BPh}_3)_2]$  in  $\text{CD}_2\text{Cl}_2$  at  $20^\circ\text{C}$ .

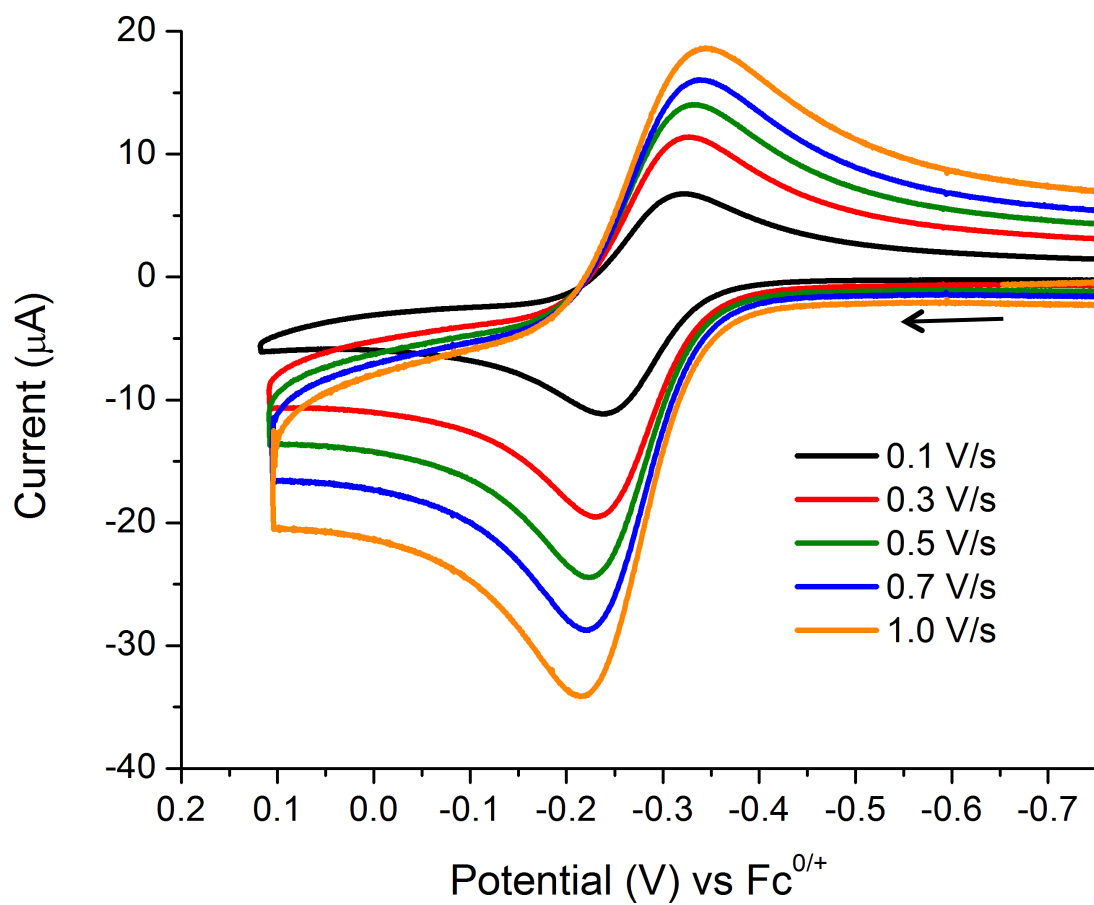

Figure S21. Oxidation of  $(\text{Et}_4\text{N})_2[\mathbf{1}(\text{BAr}^{\text{F}}_3)_2]$  in  $\text{CH}_2\text{Cl}_2$  by Cyclic Voltamogramm.

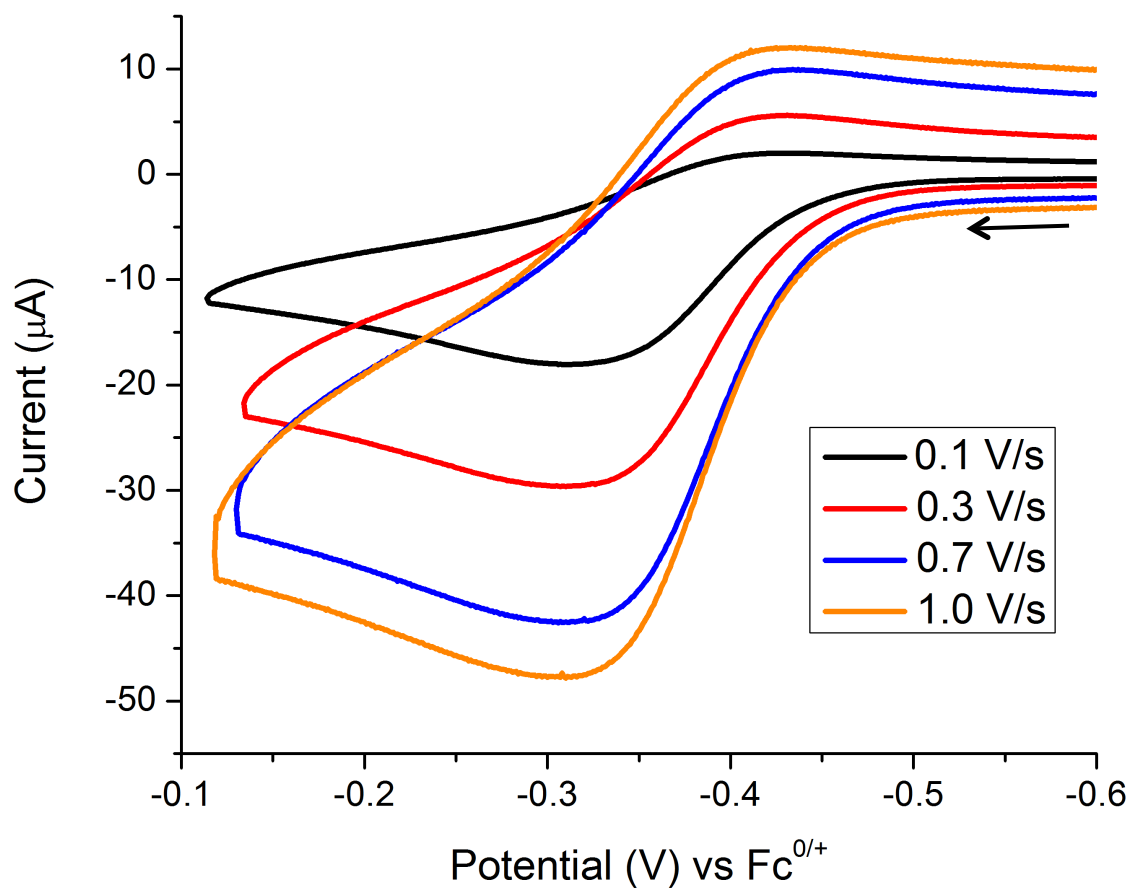

Figure S22. Oxidation of  $(\text{Et}_4\text{N})_2[\mathbf{1}(\text{BPh}_3)_2]$  in  $\text{CH}_2\text{Cl}_2$  by Cyclic Voltammetry.



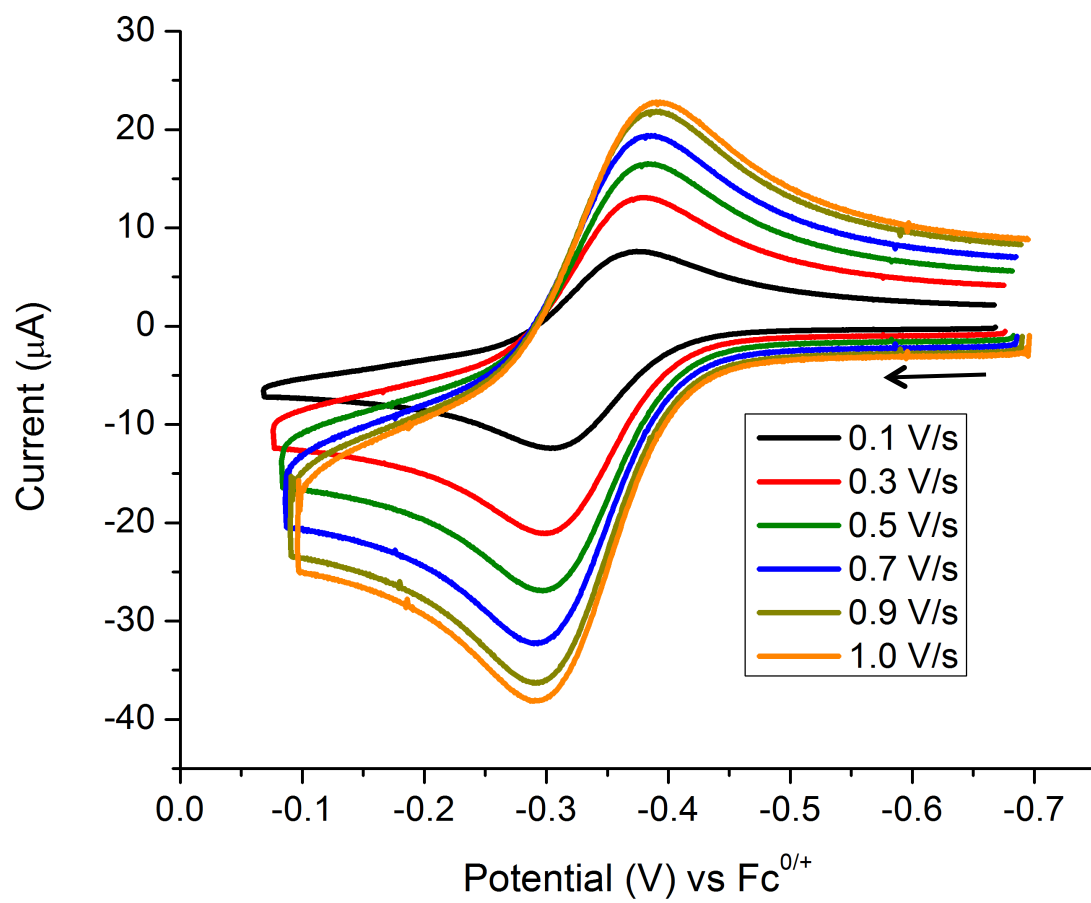

Figure S23. Oxidation of  $(\text{Et}_4\text{N})_2[\mathbf{1}(\text{BAr}^{\text{F}\#}_3)_2]$  in  $\text{CH}_2\text{Cl}_2$  by Cyclic Voltamogramm.

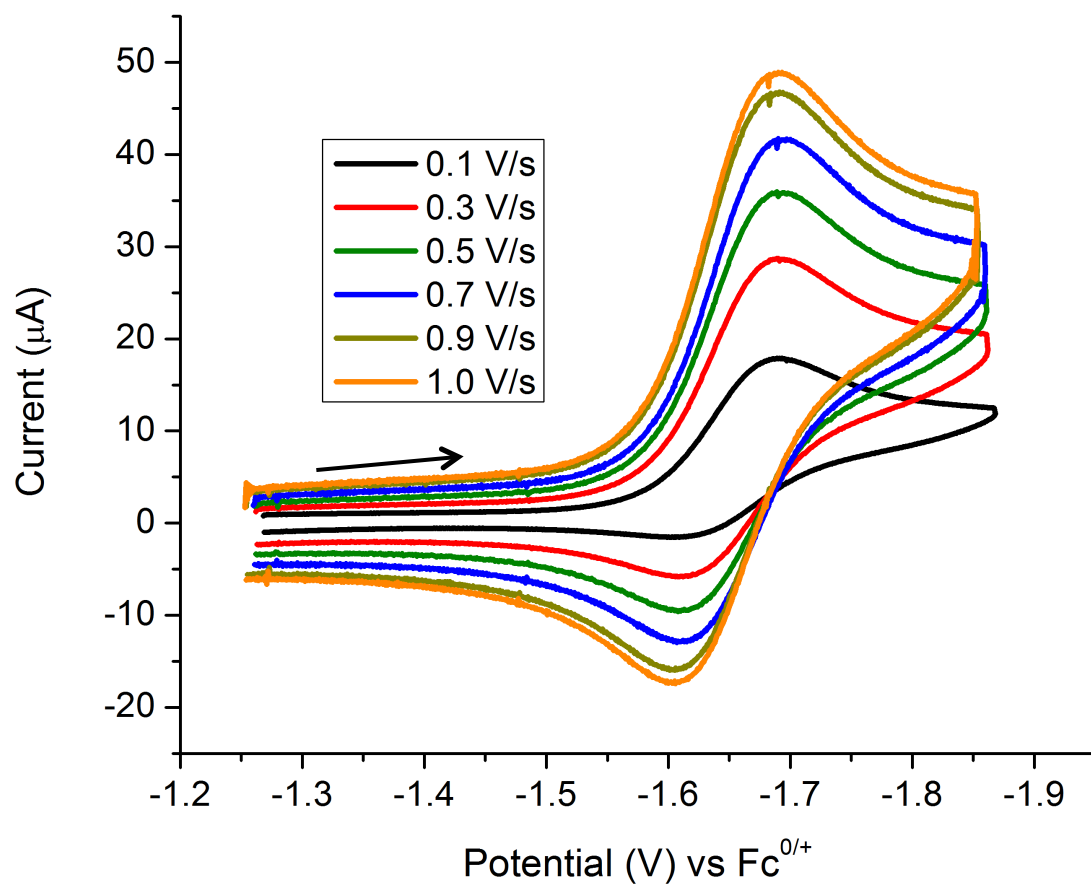

Figure S24. Reduction of  $\text{Et}_4\text{N}[\text{H1}(\text{BAr}^{\text{F}}_3)_2]$  in  $\text{CH}_2\text{Cl}_2$  by Cyclic Voltammetry.

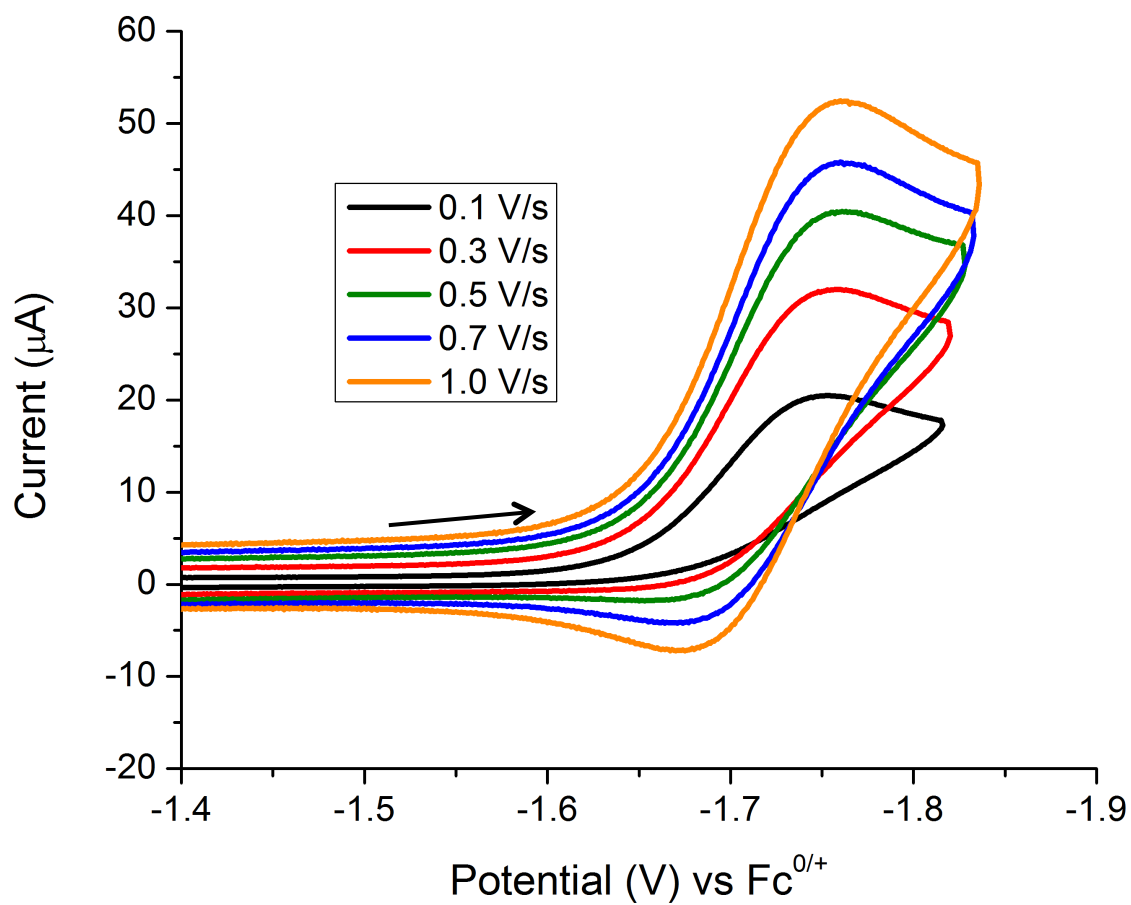

Figure S25. Reduction of  $\text{Et}_4\text{N}[\text{H1}(\text{BPh}_3)_2]$  in  $\text{CH}_2\text{Cl}_2$  by Cyclic Voltammetry.

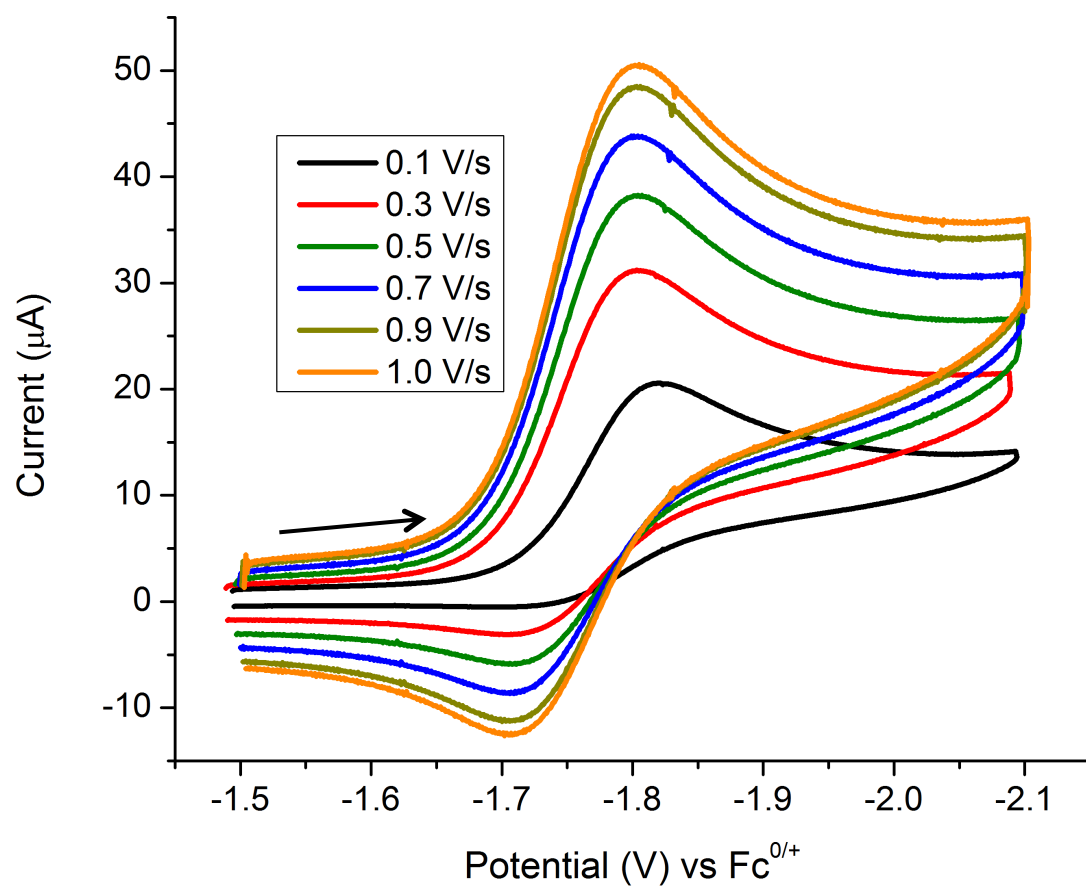

Figure S26. Reduction of  $\text{Et}_4\text{N}[\text{H1}(\text{BAr}^{\text{F}\#}_3)_2]$  in  $\text{CH}_2\text{Cl}_2$  by Cyclic Voltammetry.

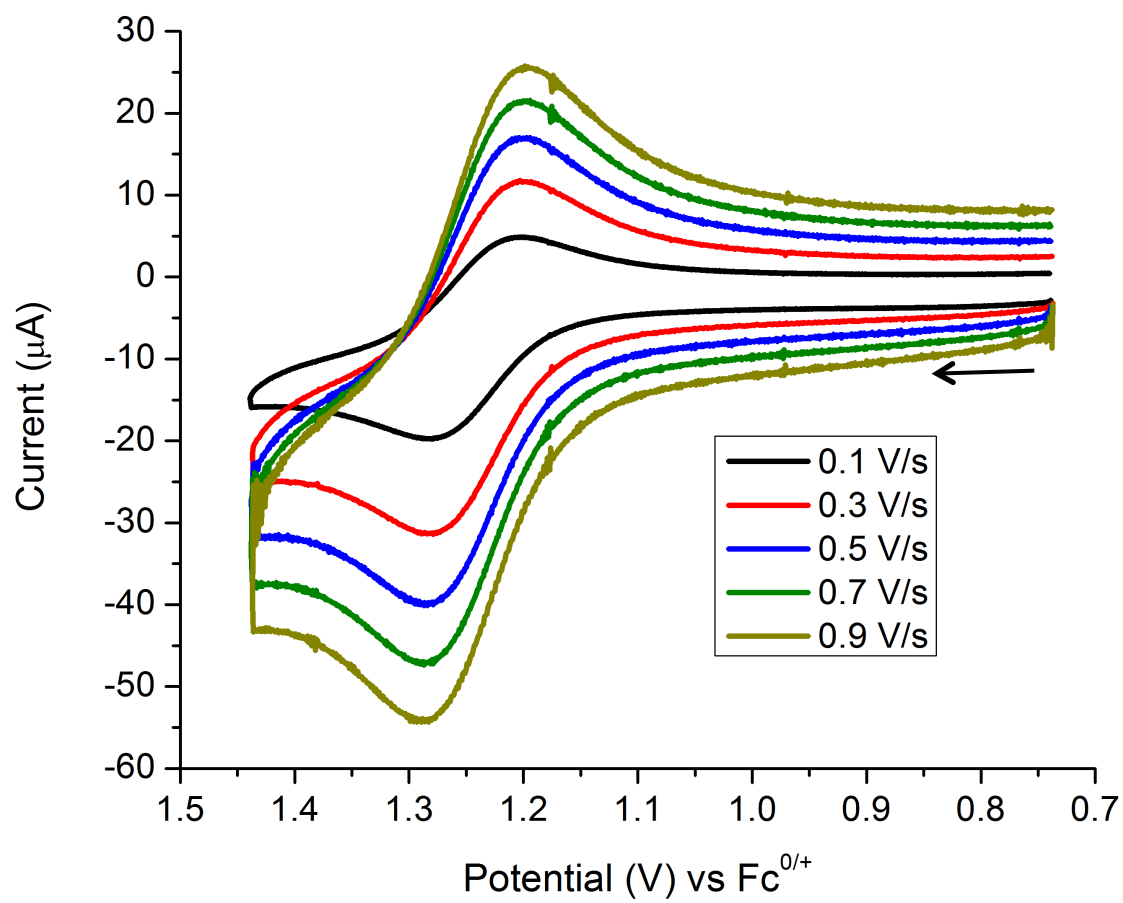

Figure S27. Oxidation of  $\text{Et}_4\text{N}[\text{H1}(\text{BAr}^{\text{F}}_3)_2]$  in  $\text{CH}_2\text{Cl}_2$  by Cyclic Voltammetry.

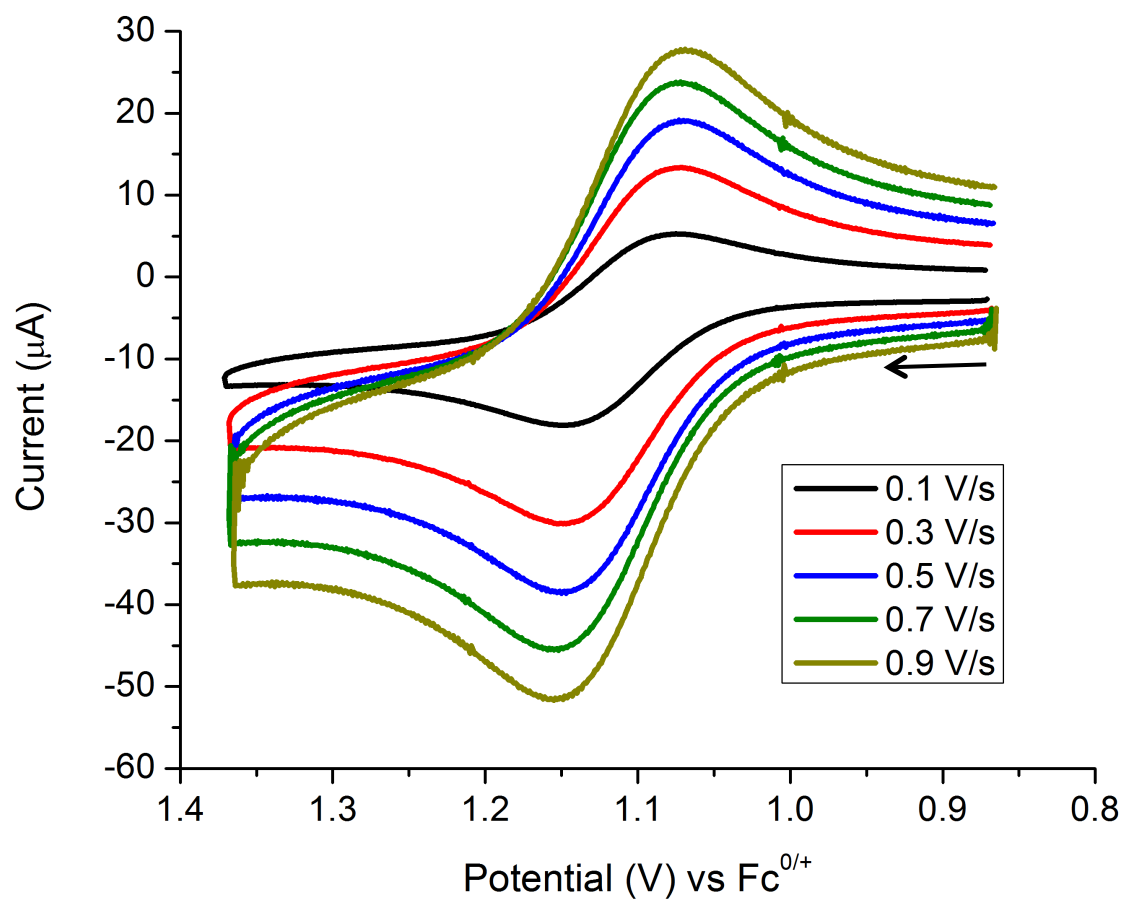

Figure S28. Oxidation of  $\text{Et}_4\text{N}[\text{H1}(\text{BAr}^{\text{F}\#}_3)_2]$  in  $\text{CH}_2\text{Cl}_2$  by Cyclic Voltamogramm.

## References

- (1) Schmidt, M.; Contakes, S. M.; Rauchfuss, T. B. *J. Amer. Chem. Soc.* **1999**, *121*, 9736.
